1 **Identification of circadian rhythms in *Nannochloropsis* species using bioluminescence**  
2 **reporter lines**

3

4 Eric Poliner<sup>1</sup>, Cameron Cummings<sup>2‡</sup>, Linsey Newton<sup>2</sup>, Eva M. Farré<sup>1,2\*</sup>

5

6 <sup>1</sup> Cell and Molecular Biology Program, Michigan State University, <sup>2</sup> Department of Plant  
7 Biology, Michigan State University, East Lansing, MI 48824, USA

8

9 Eric Poliner: ericpoli@msu.edu

10 Cameron Cummings: camerontcummings@gmail.com

11 Linsey Newton: newtonl2@msu.edu

12 Eva M. Farré: farre@msu.edu

13

14 ‡Present address: Adimab, Lebanon, NH

15

16 Running head: Circadian rhythms in Nannochloropsis

17

18 **\*Corresponding author information:**

19 Eva M Farré

20 Department of Plant Biology

21 Michigan State University,

22 612 Wilson Road, Room 166

23 East Lansing, MI, 48824

24 Email: farre@msu.edu

25 Tel: 517-353-5215

26

27

28

29

30

31

## 32 **Summary**

33 Circadian clocks allow organisms to predict environmental changes caused by the rotation of the  
34 Earth. Although circadian rhythms are widespread among different taxa, the core components of  
35 circadian oscillators are not conserved and differ between bacteria, plants, animals and fungi.  
36 Stramenopiles are a large group of organisms in which circadian rhythms have been only poorly  
37 characterized and no clock components have been identified. We have investigated cell division  
38 and molecular rhythms in *Nannochloropsis* species. In the four strains tested, cell division  
39 occurred principally during the night period under diel conditions, however, rhythms dampened  
40 within 2-3 days after transfer to constant light. We developed firefly luciferase reporters for  
41 long-term monitoring of *in vivo* transcriptional rhythms in two *Nannochloropsis* species, *N.*  
42 *oceanica* CCMP1779 and *N. salina* CCMP537. The reporter lines express free-running  
43 bioluminescence rhythms with periods of ~21-31 h that dampen within ~3-4 days under constant  
44 light. Using different entrainment regimes, we demonstrate that these rhythms are regulated by a  
45 circadian-type oscillator. In addition, the phase of free-running luminescence rhythms can be  
46 modulated pharmacologically using a CK1  $\epsilon/\delta$  inhibitor, suggesting a role of this kinase in the  
47 *Nannochloropsis* clock. Together with the molecular and genomic tools available for  
48 *Nannochloropsis* species, these reporter lines represent an excellent system for future studies on  
49 the molecular mechanisms of stramenopile circadian oscillators.

50

## 51 **Significance statement**

52 Stramenopiles are a large and diverse line of eukaryotes in which circadian rhythms have been  
53 only poorly characterized and no clock components have been identified. We have developed  
54 bioluminescence reporter lines in *Nannochloropsis* species and provide evidence for the presence  
55 of a circadian oscillator in stramenopiles; these lines will serve as tools for future studies to  
56 uncover the molecular mechanisms of circadian oscillations in these species.

57

## 58 **Keywords**

59 circadian rhythms, stramenopiles, luciferase, transcription, cell division, bioluminescence  
60 reporter, *Nannochloropsis oceanica*, *Nannochloropsis salina*, *Nannochloropsis* genus

61

## 62 **Introduction**

63 Circadian clocks generate physiological rhythms of periods of ~ 24 h in the absence of external  
64 cues. Circadian clocks are found in organisms that live exposed to daily light/dark cycles and  
65 allow them to predict and adapt to changes in their environment. In photosynthetic organisms,  
66 these clocks modulate photosynthetic capacity, growth, development, and responses to biotic and  
67 abiotic stimuli and have been shown to be necessary for optimal growth and survival (Dodd *et al.*,  
68 2004, Gehan *et al.*, 2015, Ouyang *et al.*, 1998, Woelfle *et al.*, 2004, Yerushalmi *et al.*, 2011).  
69 However, some cyanobacteria and plant species apparently lack self-sustained rhythms  
70 (Gyllenstrand *et al.*, 2014, Holtzendorff *et al.*, 2008). Although evidence of rhythmic behavior  
71 has been detected in a large number of species in different taxa, a good understanding of the  
72 molecular components of circadian oscillators is only available for a few species of bacteria  
73 (Cohen and Golden 2015), archeoplastida (green algae and plants)(Linde *et al.*, 2017, Noordally  
74 and Millar 2015) and opisthokonts (animals and fungi) (Crane and Young 2014, Dunlap and  
75 Loros 2017). Little is known about the molecular mechanisms underlying the circadian clock in  
76 other eukaryotic lineages such as rhizaria, stramenopiles, or excavates.

77

78 In eukaryotes, circadian controlled transcription is regulated by a system of interlocked  
79 transcription-translation feedback loops. These circadian oscillators can be reset or entrained by  
80 environmental changes such as temperature and light, but are able to maintain similar periods  
81 across a wide range of ambient temperatures, a characteristic known as temperature  
82 compensation. In spite of the similarities among the structure of eukaryote circadian oscillators,  
83 their key components are not conserved among taxa. Studies on one or two model organisms in  
84 each taxon have driven our understanding of the mechanisms of these different circadian clocks  
85 (Bell-Pedersen *et al.*, 2005). The clocks of green algae and plants are characterized by the  
86 presence of pseudo-response regulators (PRRs) and the single MYB domain transcription factors  
87 (LHY), which were initially identified and characterized in *Arabidopsis thaliana*. The search for  
88 homologous genes have led the identification of clock components in other land plants and green  
89 algae, such as *Ostreococcus taurii* (Corellou *et al.*, 2009, Linde *et al.*, 2017). In a similar  
90 manner, the identification of the key components of animal clocks, which include basic helix-  
91 loop-helix PAS (Per/Arnt/Sim) proteins such as CLOCK, CYCLE and BMAL and animal type  
92 cryptochromes (Crane and Young 2014), was initially driven by work on fruit flies (Bargiello *et*

93 *al.*, 1984, Zehring *et al.*, 1984). Comparative analyses then identified homologous clock genes in  
94 mammals (Tei *et al.*, 1997). Work on the fungus *Neurospora crassa* led to the discovery of the  
95 core components of fungal clocks, frequency (FRQ) and the LOV-domain containing light  
96 receptor white collar 1 (WC-1) (Crane and Young 2014). In this case, conservation of clock  
97 components has also been explored to investigate the role of the clock in other species (Hevia *et*  
98 *al.*, 2015, Lee *et al.*, 2018).

99

100 Stramenopiles or heterokonts are a diverse group of secondary endosymbionts, in which a  
101 previously non-photosynthetic eukaryote incorporated a red alga, and are phylogenetically  
102 distant from the other photosynthetic lineages such as Viridiplantae (green algae and plants)  
103 (Burki 2014). While stramenopiles include photosynthetic and non-photosynthetic groups, most  
104 stramenopiles are aquatic and comprise one of the most abundant groups found in phytoplankton  
105 (Rynearson and Palenik 2011). Transcriptome studies under light/dark cycles, have shown that a  
106 large proportion of transcripts is diel regulated in stramenopiles (Ashworth *et al.*, 2013, Chauton  
107 *et al.*, 2013, Gravot *et al.*, 2010, Poliner *et al.*, 2015, Smith *et al.*, 2016). Diel oscillations in  
108 sporulation and gene expression have been also been observed in the oomycete *Phytophthora*  
109 *infestans*, a non-photosynthetic stramenopile (Xiang and Judelson 2014). Self-sustained 24 h  
110 rhythms under constant environmental conditions have been measured in a few stramenopiles  
111 such as diatoms (Ragni and D'alcala 2007), brown algae (Schmid and Dring 1992, Schmid *et al.*,  
112 1992) and *Nannochloropsis gaditana* (Braun *et al.*, 2014). However, other key characteristics of  
113 circadian oscillators such as entrainment by environmental signals or temperature compensation  
114 have not been investigated in stramenopiles.

115

116 Algae from the *Nannochloropsis* genus are a potential powerful model to characterize the  
117 circadian clock in stramenopiles. This genus of small non-motile unicellular algae includes fresh  
118 and marine species, although most studies have focused on salt water species due to their use as a  
119 source of fish food and omega-3 fatty acids, and their biotechnological potential. Diel rhythms in  
120 gene expression and cell division have been described in *N. oceanica* CCMP1779 and free  
121 running 24 h rhythms in chlorophyll content have been reported in *N. gaditana* CCMP1779  
122 (Braun *et al.*, 2014). Several *Nannochloropsis* strains from different worldwide locations have  
123 been sequenced and current data suggests that *Nannochloropsis* species are haploid with genome

124 sizes of ~30 Mb, containing from ~6,500 to ~12,000 genes (Corteggiani Carpinelli *et al.*, 2014,  
125 Radakovits *et al.*, 2012, Schwartz *et al.*, 2018, Vieler *et al.*, 2012, Wang *et al.*, 2014). Recent  
126 years have seen the development of a comprehensive set of molecular tools for working with  
127 these algae, such as homologous gene replacement, overexpression, gene silencing and  
128 CRISPR/Cas9 based genome editing (Kilian *et al.*, 2011, Poliner *et al.*, 2018a, Poliner *et al.*,  
129 2018b, Poliner *et al.*, 2018c, Verruto *et al.*, 2018, Wang *et al.*, 2016, Wei *et al.*, 2017). In this  
130 study, we describe the development of a bioluminescence reporter system for the long-term *in*  
131 *vivo* measurement of gene expression in two *Nannochloropsis* species. We report a  
132 comprehensive analysis of entrainment and light and temperature dependence of circadian  
133 rhythms in *Nannochloropsis* genus, which form the base for future molecular characterization of  
134 the circadian oscillator in this stramenopile.

135

## 136 **Results**

### 137 ***Nannochloropsis* species display oscillations in cell division under constant light conditions**

138 *N. oceanica* CCMP1779 cultures grown under 12 h/12 h light/dark cycles synchronize their cell  
139 division, with DNA synthesis occurring during the second part of the light period and cytokinesis  
140 occurring during the night (Poliner *et al.*, 2015). To test if cell division is regulated by a  
141 circadian oscillator in *Nannochloropsis* species we measured cell numbers in cultures entrained  
142 under light/dark cycles and released into constant light (Fig. 1a). We analyzed four lines from  
143 two *Nannochloropsis* species originating from different latitudes (Figure S1). For our initial  
144 experiments, we chose a lower light intensity for the free running condition ( $40 \mu\text{mol m}^{-2} \text{s}^{-1}$ )  
145 than the entrainment condition ( $100 \mu\text{mol m}^{-2} \text{s}^{-1}$ ) as has been used for experiments in the green  
146 marine algae *Ostreococcus tauri*. We observed cycling under light/dark for all four species.  
147 However, although all lines tested displayed a gated cell division during the second day under  
148 constant light conditions, two lines, CCMP537 and CCMP1778 did not display an oscillation  
149 during the first day in constant light. This transient effect could be due to the differences in light  
150 intensity under entrainment and free run conditions. We therefore analyzed growth in cells  
151 entrained and released at the same light intensity of  $40 \mu\text{mol m}^{-2} \text{s}^{-1}$  (Fig. 1b). In this case, cell  
152 division in both *N. salina* CCMP537 and *N. oceanica* CCMP1779 was gated during the first day  
153 in constant light, but rhythms in the rate of cell division damped over the course of the  
154 experiment (Fig. 1c). The period estimate for *N. salina* CCMP537 using FFT-NLLS was 31 h,

155 but no period estimation was possible for *N. salina* CCMP1779. Similar results were obtained  
156 with cells entrained and released at  $100 \mu\text{mol m}^{-2} \text{s}^{-1}$  (Figure S2). These cell division rhythms in  
157 *Nannochloropsis* species are weaker than the tight synchronization observed in green algae  
158 (Goto and Johnson 1995, Moulager *et al.*, 2007) but similar to weak rhythms observed in the  
159 diatom *Phaeodactylum tricornutum* (Ragni and D'alcala 2007).

160

### 161 **Development of luciferase reporter lines in *Nannochloropsis* species**

162 In order to carry out a more detailed analysis of the rhythms observed in *Nannochloropsis*  
163 species, we developed bioluminescence reporter lines. We first tested three luciferase enzymes in  
164 the line *N. oceanica* CCMP1779, the Firefly luciferase (FLUC), Renilla luciferase (RLUC) and  
165 Nanoluciferase (NLUC). FLUC has been widely used as a circadian reporter in multiple systems  
166 (Welsh *et al.*, 2005, Welsh and Kay 2005), however, RLUC and the engineered NLUC have the  
167 advantage of being smaller proteins, and catalyze ATP-independent reactions (England *et al.*,  
168 2016, Hall *et al.*, 2012). We have recently used NLUC to quantify protein expression in *N.*  
169 *oceanica* CCMP1779 (Poliner *et al.*, 2018c). The codon optimized luciferase coding regions  
170 were expressed under the control of the *CELLULOSE SYNTHASE* promoter (*CS*), a gene with  
171 strong oscillations in RNA levels under light/dark cycles (Poliner *et al.*, 2015). All  
172 *CS::LUCIFERASE* expressing lines displayed peaks of bioluminescence during the dark period  
173 in accordance to the expression of the endogenous *CS* gene (Fig. 2a)(Poliner *et al.*, 2015).  
174 Although RLUC and NLUC expressing lines showed high initial levels of luminescence both  
175 reporters displayed a strong decrease of signal during the course of an experiment. In the case of  
176 RLUC, this decrease is likely due to the chemical instability of its substrate, coelenterazine, in  
177 aqueous solution (Andreu *et al.*, 2010). The NLUC substrate, furimazine, was initially selected  
178 for its higher stability under animal tissue culture conditions (Hall *et al.*, 2012) and we tested  
179 whether instability under our culture conditions could explain the decrease in signal. Refeeding  
180 of substrate within a time course transiently increased the amplitude of oscillations of NLUC  
181 expressing lines but had little effect on FLUC luminescence, indicating that the NLUC substrate  
182 might be unstable under our experimental conditions (Figure S3). We also tested FLUC  
183 expression under the control of the *light harvesting complex 8* gene (*LHC8*) promoter in *N.*  
184 *oceanica* CCMP1779. The bioluminescence of this reporter peaked at dawn, which correlated to  
185 the morning expression of the *LHC8* gene in this strain (Fig. 2a)(Poliner *et al.*, 2015).

186  
187 Under light/dark cycles, all the luciferase constructs tested led to oscillations in luciferase protein  
188 content that were delayed with respect to the RNA level of the corresponding gene, *CS* or *LHC8*  
189 (Fig. 2b, c). The doublet band in the *LHC8::FLUC* expressing lines is likely caused by an  
190 alternative translational start site within the *LHC8* upstream sequence. The *in vivo* FLUC  
191 bioluminescence correlated well with RNA levels of the *CS* gene (Fig. 2c). In contrast, the  
192 maximum RLUC and NLUC *in vivo* bioluminescence were delayed with respect to the *CS* RNA  
193 levels. These results indicate that *in vivo* firefly luciferase enzyme has a short catalytic activity  
194 half-life in *Nannochloropsis* species. In animal cells, firefly luciferase also responds faster than  
195 nanoluciferase (Hall *et al.*, 2012), which might be due to the product inhibition of the firefly  
196 luciferase enzyme (Leitao and Esteves da Silva 2010). Therefore, FLUC *in vivo* luminescence in  
197 the presence of substrate appears to reflect the rate of production of newly synthesized luciferase  
198 enzyme, which in our case, correlates with its RNA content, in a similar manner to what has been  
199 observed in higher plants (Farre and Kay 2007, Millar *et al.*, 1992).

200  
201 Due to the robust activity of FLUC reporters in *N. oceanica* CCMP1779, we also developed  
202 luciferase reporter lines in *N. salina* CCMP537. *N. salina* strains display oscillations in cell  
203 division (Fig. 1) and the genome of *N. salina* CCMP537 has been sequenced (Wang *et al.*, 2014).  
204 In *N. salina* CCMP537, the FLUC reporter under the control of its endogenous *CS* promoter also  
205 maintained high amplitude oscillations under light/dark cycles with bioluminescence maxima  
206 during the dark period (Fig. 3). As in *N. oceanica* CCMP1779, *LHC8* driven FLUC *in vivo*  
207 bioluminescence in *N. salina* CCMP537 displayed a dawn peak of expression that weakened  
208 during the course of the experiment. The differences in the time of maximum expression  
209 between *CS* and *LHC8* driven FLUC in both *Nannochloropsis* species tested indicate that the  
210 oscillations of *in vivo* FLUC activity are not due to changes of endogenous ATP levels, a  
211 substrate of firefly luciferase, but reflect differences in transcriptional activity of these promoters  
212 during the light/dark cycle. We therefore, focused on *N. oceanica* CCMP1779 and *N. salina*  
213 CCMP537 *CS::FLUC* lines to further characterize the circadian rhythms of *Nannochloropsis*  
214 species. For brevity, these lines are described from now on as *N. oceanica* and *N. salina* in the  
215 text and figures.

216

217 ***Nannochloropsis* species display damping oscillations in gene expression under constant**  
218 **light conditions**

219 Under light/dark cycles, both *CS::FLUC* and *LHC8::FLUC* reporters displayed anticipatory  
220 behavior under light/dark cycles indicating the presence of an endogenous oscillator (Fig. 2, 3).  
221 To test if *Nannochloropsis* species maintain transcriptional rhythms under constant light we  
222 measured *in vivo* bioluminescence in *N. salina* and *N. oceanica* expressing the *CS::FLUC*  
223 reporter, which exhibited higher amplitude rhythms (Fig. 4). Since rhythms in the marine green  
224 algae *Ostreococcus tauri* are lost at moderate to high light intensities we first tested  
225 luminescence rhythms under different intensities of white light (Moulager *et al.*, 2007).  
226 Bioluminescence traces were detrended and the periods estimated using Biodare 2 (Moore *et al.*,  
227 2014)(Figure S4). After entrainment under light/dark cycles, *N. salina* maintained rhythms for 2-  
228 3 cycles in constant white light conditions. The length of its free running period was ~27 h under  
229  $10 \mu\text{mol m}^{-2} \text{s}^{-1}$  and ~26 h under  $40 \mu\text{mol m}^{-2} \text{s}^{-1}$ , but under  $100 \mu\text{mol m}^{-2} \text{s}^{-1}$  of white light no  
230 rhythmic cultures were observed. In contrast, *N. oceanica* displayed weaker rhythms than in *N.*  
231 *salina* under constant white light, with fewer rhythmic cultures (Fig. 4). In particular, under  $10$   
232  $\mu\text{mol m}^{-2} \text{s}^{-1}$  white light, only 25% of the cultures were rhythmic based on our rhythmic criteria  
233 (see Methods). Under weak red light, *N. salina* displayed erratic oscillations and no rhythmic  
234 cultures, however, better rhythms were detected under  $40 \mu\text{mol m}^{-2} \text{s}^{-1}$  red light with an average  
235 period of 29 h. In contrast, *N. oceanica*'s rhythms were weaker under blue light than under red  
236 light. In the dark under autotrophic conditions, firefly luciferase reporter activity in both  
237 *Nannochloropsis* species was strongly decreased, as is the case with the marine unicellular algae  
238 *Ostreococcus taurii* (Figure S5) (O'Neill *et al.*, 2011).

239

240 ***In vivo* luminescence rhythms are temperature compensated and are maintained under**  
241 **short light/dark cycles**

242 One of the key characteristics of circadian oscillators is their ability to maintain similar circadian  
243 periods under a wide range of temperatures, which is termed temperature compensation. We  
244 investigated *CS::FLUC* driven luminescence under low white light and temperatures ranging  
245 from 17°C to 28°C (Fig. 5a). *N. salina* displayed oscillations in all temperatures tested; all  
246 cultures were rhythmic under 19°C and 22°C, but only ~60% were rhythmic at the higher  
247 temperatures tested. In contrast, the rhythms were weak for *N. oceanica* at all temperatures tested



248 and cyclic cultures were observed only under 19°C, 22°C and 25°C (Figure S6). In *N. salina* the  
249 estimated period lengths showed great variability, ranging from 23 to 31 h (Fig. 5b). We  
250 calculated the  $Q_{10}$ , the factor by which the rate of a reaction varies in response to a 10 °C change,  
251 to quantify the degree of temperature compensation of *N. salina* bioluminescence rhythms. Using  
252 all the available data we estimated the temperature compensation for transcriptional rhythms in  
253 *N. salina* to have a  $Q_{10}$  of ~ 1.1, which lies within the range of other characterized circadian  
254 oscillations in plants(Kusakina *et al.*, 2014) and algae (Anderson *et al.*, 1985)(Fig. 5b).

255

256 Environmental factors that entrain circadian oscillators (zeitgebers), such as light, can lead to  
257 masking of the measured physiological rhythm. For example, light inhibits locomotor activity in  
258 mice and therefore mice activity is arrhythmic under constant light conditions (Ohta *et al.*, 2005).  
259 A similar effect could be involved in the damping rhythms of transcriptional luciferase reporters  
260 under constant light conditions in *Nannochloropsis* species. Since circadian oscillators change  
261 the time-dependent sensitivity towards the entrainment signal, in this case light, short light/dark  
262 cycles can reveal free-running rhythms, a process called frequency-demultiplication, in  
263 organisms in which masking occurs (Aschoff 1999). Therefore, when the endogenous period is a  
264 multiple of the frequency of the light/dark cycle, organisms with a circadian oscillator maintain  
265 their entrainment to the 24 h cycle and do not entrain to the new shorter cycles. To further test  
266 whether a circadian oscillator is present in *Nannochloropsis* species, we measured rhythms under  
267 short cycles of 3 h light and 3 h darkness (period = T= 6 h). Under T6 cycles both  
268 *Nannochloropsis* species revealed no ultradian oscillations during the first day but small  
269 amplitude 6 h oscillations were detectable the second day onwards, such that the *CS::FLUC*  
270 reporter was induced in the dark and repressed in the light (Fig. 5c, Figure S7a). At 22° C *N.*  
271 *oceanica* and *N. salina* cells maintained bioluminescence oscillations for three days with average  
272 periods of 23.8 h and 28.6 h respectively (Fig. 5b, Figure S7c). As observed for the  
273 bioluminescence rhythms under constant light, the circadian rhythms in *N. salina* were more  
274 robust than the oscillations from *N. oceanica*, and 88% *N. salina* *CS::FLUC* cultures scored as  
275 rhythmic in these experiments in contrast to 28% for *N. oceanica*. Similar period lengths were  
276 observed in *N. salina* cells expressing the *LCH8::FLUC* reporter although the amplitude of these  
277 oscillations was much reduced and the *LHC* reporters were sensitive to the short light/dark cycles  
278 throughout the treatment (Figure S7b,c).

279  
280 We also quantified the circadian period at different constant temperatures in *N. salina* under T6  
281 cycles (Fig. 5c,d). Rhythmic cultures were detected at all three temperatures tested (Fig. 5c, d).  
282 Cultures at 19°C lacked ultradian oscillations during both the first and second day in T6  
283 conditions indicating a more robust circadian regulation than at higher temperatures. *N. salina*  
284 *CS::FLUC* rhythms under T6 had a  $Q_{10}$  of 1.2, similar to the rhythms under constant light  
285 conditions (Fig. 5b,c).

### 286 287 **Luminescence rhythms in *Nannochloropsis* species respond to changes by light cues**

288 To determine if the *in vivo* luminescence rhythms could be reset by light we first carried out a  
289 simulated jet lag experiment, in which *N. salina CS::FLUC* cells were entrained under light/dark  
290 conditions and then treated with a night extension of 6 h (Fig. 6a). This treatment led to a phase  
291 advance of 1-2 h in the first day after the shift; the *N. salina* cultures were able to entrain to the  
292 new phase by the second day. The small phase shift and the delay in resetting indicates the  
293 presence of an endogenous oscillator, such that the oscillations in luminescence are not only  
294 driven by the light/dark cycles.

295  
296 To further investigate light entrainment in *N. salina* we carried out phase shift experiments under  
297 different light qualities. *N. salina CS::FLUC* cultures were grown under white 12h light/12 h  
298 dark cycles, treated with dark periods of different durations and then transferred to constant  
299 white, red or blue light conditions (Fig. 6b, c; Figure S8). As observed in the previous jet-lag  
300 experiments an extension of the dark period led to a delay in phase that correlated with the length  
301 of the dark extension (Fig. 6c,d, Figure S8). Dark periods shorter than 12 h led to phase advances  
302 of 2-3 h, which were shorter than the observed delays (Fig. 6b,d, Figure S8). These delays and  
303 advances were similar between blue and white light treatments; however, phase advances were  
304 slightly stronger under red light. In the absence of a dark period, the phase was delayed under  
305 blue and white light but not under red light. After the phase shifts, the new phase was maintained  
306 during the second day under free running conditions indicating a change in the phase of a  
307 circadian oscillator and not a direct light effect on the reporter expression (Fig. 6d). Under red  
308 light conditions rhythms dampened quickly (Figure S8b), making it difficult to determine the

309 phase of the second peak of luminescence. These experiments further indicate the presence of a  
310 circadian oscillator in the genus *Nannochloropsis*.

311

312 Another characteristic of circadian oscillators is that they determine the phase relationship or  
313 phase angle of gene expression within a 24 h light/dark cycle (T24). Circadian control leads to  
314 phase advances when the cycles are longer than 24 h and two phase delays when the cycles are  
315 shorter than 24 h (Johnson *et al.*, 2003). We determined the phase angle, the relative time of peak  
316 expression of the *CS::FLUC* reporter within one cycle, in *N. salina* and *N. oceanica* under T20,  
317 T22, T24 and T26. Both species displayed stable entrainment under these conditions (Fig. 6e and  
318 f), however, the relative time of expression of the reporter within the light/dark cycles was  
319 advanced under T26 and delayed under T20 and T22 (Fig. 6g and h) supporting the presence of  
320 an endogenous oscillator.

321

### 322 **Entrainment of luminescence rhythms by temperature**

323 In most organisms, temperature, in addition to light, plays an important role in resetting the  
324 circadian clock (Rensing and Ruoff 2002). We investigated entrainment of *CS::FLUC*  
325 oscillations in *Nannochloropsis* species by growing cultures under temperature cycles of 12 h  
326 27°C and 12 h 17°C under constant light conditions. Temperature cycles were able to maintain  
327 robust high amplitude oscillations in both *N. salina* and *N. oceanica* (Fig. 7). The peak of  
328 *CS::FLUC* expression in both species occurred at the end of the warm period, an earlier phase  
329 than light entrainment. This phase relationship was maintained when cultures were transferred to  
330 constant temperature and light conditions. As observed for light entrained cultures, only a few *N.*  
331 *oceanica* cultures were rhythmic after temperature entrainment (Figure 7). For *N. salina*, the  
332 estimated average period of the luminescence rhythm after temperature entrainment, 28.8 h, was  
333 similar to the period after light entrainment.

334

### 335 **Potential clock components in the *Nannochloropsis* genomes**

336 No circadian clock component has been identified in stramenopiles, however, *Nannochloropsis*  
337 genomes encode for genes with some similarities to plant and animal clock genes (Vieler *et al.*,  
338 2012). Proteins containing plant-specific CCT domains are involved in circadian and  
339 photoperiod control in land plants and green algae (Farre and Liu 2013, Serrano *et al.*, 2009). We

340 identified three CCT containing proteins annotated in the *N. oceanica* and the *N. gaditana*  
341 genomes and one in the *N. salina* genome (Figure S9). The CCT domains across stramenopiles  
342 display higher similarity to each other than to CCT domains outside that group. The expression  
343 of two of the CCT *N. oceanica* genes cycle under light/dark conditions (Figure S10a) (Poliner *et al.*, 2015). None of the currently annotated stramenopile CCT domain proteins appear to contain  
344 either response-regulator or BBOX domains, which are characteristic in green algae and land  
345 plant proteins with circadian or photoperiod function, and therefore, their potential role in the  
346 clock remains unclear.  
347

348  
349 *Nannochloropsis* species contain an animal cryptochrome like protein, homologe to the diatom  
350 CPF1 (cryptochrome photolyase family) (Vieler *et al.*, 2012) (Figure S11). Diatom CPF1 has  
351 been shown to be able to inhibit the transcriptional activity of the mouse clock proteins BMAL  
352 and CLOCK in a heterologous system, and has been proposed to be involved in circadian  
353 regulation (Coesel *et al.*, 2009). BMAL1 and CLOCK are part of the bHLH-PAS protein family,  
354 whose members are involved in circadian regulation in animals (Crane and Young 2014). bHLH-  
355 PAS proteins are not found in green algae or land plants but have been identified in red algae and  
356 stramenopile genomes including *Nannochloropsis* species (Thiriet-Rupert *et al.*, 2016, Vieler *et al.*, 2012)(Figure S12). Three of the four *N. oceanica* CCMP1779 bHLH-PAS proteins cycle  
357 under light/dark conditions (Figure S10b). In stramenopiles, these proteins contain only one PAS  
358 domain instead of the two PAS domains found in animal proteins (Figure S12a) and therefore it  
359 has been suggested that the stramenopile proteins are an example of convergent evolution  
360 (Thiriet-Rupert *et al.*, 2016).  
361

362  
363 Casein kinase 1 (CK1) is a conserved component of circadian systems in eukaryotes and the  
364 pharmacological inhibition of CK1 affects the circadian period in mammals (Badura *et al.*, 2007,  
365 Eide *et al.*, 2005, Walton *et al.*, 2009), *Drosophila melanogaster* (Meng *et al.*, 2010),  
366 *Neurospora crassa* (Querfurth *et al.*, 2011), *Ostreococcus tauri* (van Ooijen *et al.*, 2013) and  
367 *Caenorhabditis elegans* (Goya *et al.*, 2016). *N. oceanica* contains a CK1 gene with 72% identity  
368 with mouse casein kinase 1  $\epsilon$  (NannoCCMP1779|10930); this gene cycles under light/dark  
369 conditions with a peak at dawn (Figure S13a). To further test a possible involvement of a  
370 circadian oscillator in *Nannochloropsis* species, we investigated the effect of the CK1  $\epsilon/\delta$

371 inhibitor PF-670462 on bioluminescence oscillations. In *N. salina*, PF-67462 led to phase delays  
372 of *CS::FLUC* expression in a concentration dependent manner (Fig. 8), although the free running  
373 period was only reduced in two of the tested concentrations (Figure S13b). PF-670462 treatment  
374 leads to a lengthening of the period in several organisms and causes phase delays in mammals  
375 (Badura *et al.*, 2007, van Ooijen *et al.*, 2013, Walton *et al.*, 2009). These results suggest that  
376 phosphorylation plays a key role in circadian control in *N. salina*.

377

## 378 **Discussion**

379 Circadian studies in stramenopiles have been limited to the measurement of physiological  
380 outputs such as cell division, pigment content or photosynthesis rates that are difficult to apply  
381 for high throughput studies (Makarov *et al.*, 1995, Ragni and D'alcala 2007). In this work, we  
382 describe oscillations in cell division in several *Nannochloropsis* species and used a luciferase  
383 reporter based system to characterize the circadian oscillations in the *Nannochloropsis* genus. In  
384 spite of the damping of cell division and transcriptional rhythms under free running conditions,  
385 the *Nannochloropsis* circadian clock displays key characteristics of a biological oscillator  
386 (Roenneberg *et al.*, 2005). This oscillator can be entrained by light and temperature, causes jet  
387 lag, leads to changes in the phase angle when entrained at periods slightly different than 24 h and  
388 leads to frequency demultiplication when the entraining period is much shorter than 24 h.

389

390 Under light/dark cycles mitosis occurs during the dark period in *N. oceanica* (Poliner *et al.*,  
391 2015)(Figure 1) and we observed a similar phase of cell division in the four *Nannochloropsis*  
392 strains tested. Although under constant light conditions cell division rhythms were often weak,  
393 cell division occurred during the subjective night period. Similar phases of cell division under  
394 light/dark and constant light conditions have been observed in many unicellular and multicellular  
395 eukaryotic algae (Anderson *et al.*, 1985, Goto and Johnson 1995, Johnson 2010, Makarov *et al.*,  
396 1995, Moulager *et al.*, 2007). It has been proposed that this particular phase of cell division is  
397 due to the increased UV sensitivity of the cells during the nuclear division process (Nikaido and  
398 Johnson 2000). It has also been proposed that the temporal separation of cell division from  
399 photosynthesis protects cells from excessive oxidative stress (Miyagishima *et al.*, 2014).

400

401 Bioluminescence reporters have been used widely for analysis of circadian transcriptional  
402 rhythms in a large number of species (Welsh *et al.*, 2005, Welsh and Kay 2005). We have tested  
403 several luciferase reporter genes in two *Nannochloropsis* species and shown that a firefly  
404 luciferase gene is able to track *in vivo* RNA oscillations and allows for long-term monitoring of  
405 transcription. In contrast, the *in vivo* luminescence of the small synthetic nanoluciferase tracked  
406 protein levels well but was unsuitable for long term *in vivo* monitoring. We used firefly  
407 luciferase expressing lines to analyze the fundamental properties of circadian oscillators in  
408 *Nannochloropsis*.

409  
410 In contrast to the strong sustained rhythms in other unicellular algae (Noordally and Millar  
411 2015), cell division and bioluminescence rhythms in *Nannochloropsis* species damped within 3-4  
412 days under constant light conditions. The rhythms of *N. salina* CCMP537 appear slightly more  
413 robust than the ones from *N. oceanica* CCMP1779. The period length estimations of the  
414 bioluminescence rhythms had high variability, which might be caused by the rapid damping. In  
415 *N. salina* these rhythms appeared to be temperature compensated and had average periods of  
416 ~24-31 h. The damping of these rhythms was observed when using different promoters  
417 indicating that the decrease in amplitude was not promoter specific, although it is possible that  
418 other genes show more sustained oscillations. Future studies analyzing the genome wide  
419 transcriptome oscillations will allow us to determine the extent of circadian regulation of RNA  
420 levels in *Nannochloropsis* species. It is possible that constant light conditions inhibit  
421 transcriptional rhythms in this genus. Constant light can lead to arrhythmicity in other organisms.  
422 Circadian rhythms in the green algae *Ostreococcus tauri* are abolished under constant medium to  
423 high light intensities (Moulager *et al.*, 2010), locomotor rhythms in animals and conidiation  
424 rhythms in *Neurospora crassa* are absent under constant light conditions (Pittendrigh and Daan  
425 1976, Schneider *et al.*, 2009), and dim light inhibits the rhythms of fruit flies (Winfree 1974).  
426 However, in *Nannochloropsis* species, we observed a similar degree of damping under high  
427 frequency T6 cycles (3 h light/3h dark) and under constant light. After one day in T6 the  
428 luminescence reporters started to react to the imposed light/dark cycles and this loss of gating  
429 correlated with the damping of the ~24 h rhythms in constant light (Figure 5), indicating that  
430 masking is not the cause of the damping of free running rhythms.

431

432 There are several potential explanations for the poor free running rhythmicity in  
433 *Nannochloropsis* species. The observed damping might be caused by desynchronization of the  
434 single cells in the culture as is the case of mammalian fibroblasts (Welsh *et al.*, 2004). It is also  
435 possible that the experimental conditions, including media composition, are not optimal for  
436 rhythmicity in the species studied (Doherty and Kay 2010, Hurley *et al.*, 2014, Olivares-Yanez *et*  
437 *al.*, 2016). The transcriptional rhythms in *Nannochloropsis* species could also be controlled by a  
438 damped oscillator. The dinoflagellate *Lingulodinium*, a model of early circadian studies due to its  
439 robust endogenous bioluminescence rhythms, does not appear to have strong RNA oscillations  
440 under constant light conditions (Roy *et al.*, 2014) although it does display rhythms in protein  
441 synthesis (Morse *et al.*, 1989, Morse *et al.*, 1990). Future studies will reveal the role of  
442 posttranscriptional regulation of the circadian rhythms in the *Nannochloropsis* genus.

443

444 In organisms with robust circadian clocks, these clocks provide a fitness advantage (Dodd *et al.*,  
445 2005, Woelfle *et al.*, 2004, Yerushalmi *et al.*, 2011). However, it remains unclear whether this  
446 selective advantage requires a robust self-sustained circadian oscillator or whether weaker  
447 oscillators can play a similar role. There are several photosynthetic organisms with no apparent  
448 free running oscillations. Under constant light conditions no oscillations of gene expression and  
449 chlorophyll fluorescence have been detected in the gymnosperm Norway Spruce (*Picea abies*) in  
450 spite of containing the canonical plant clock genes (Gyllenstrand *et al.*, 2014). In contrast to the  
451 widely studied *Synechococcus elongatus*, other cyanobacteria such as the abundant  
452 *Prochlorococcus* genus lack a functional *kaiA* gene and no rhythms have been detected under  
453 constant light conditions (Holtzendorff *et al.*, 2008, Schmelling *et al.*, 2017). It has been  
454 hypothesized that an hour-glass oscillator that is reset every day is sufficient for these  
455 *Prochlorococcus* species because they originate from southern latitudes where they do not  
456 experience large changes in daylength, and their marine environment is more stable than fresh  
457 water habitats (Mullineaux and Stanewsky 2009). A recent study shows that diel rhythms are  
458 stronger in *Prochlorococcus* in co-culture with a heterotrophic bacterium suggesting that biotic  
459 interactions can help maintain oscillations in plankton communities (Biller *et al.*, 2018).  
460 Experiments using arrhythmic and weakly rhythmic mutants in *S. elongatus* indicate that lines  
461 with a damped oscillator grow better than the wild type under light/dark cycles (Woelfle *et al.*,  
462 2004) which suggests that a robust clock is not required for optimal growth under diel

463 conditions. Non-motile phytoplankton are likely to be exposed to low light or dark conditions  
464 due to water circulation and turbulence. A weak damped oscillator might be faster to reset than a  
465 robust oscillator allowing for faster entrainment (Bordyugov *et al.*, 2015) and might be of  
466 advantage in non-motile marine plankton.

467

468 *Nannochloropsis* bioluminescence rhythms can be entrained by light and temperature cycles. The  
469 similarity between the blue and white light phase response curves indicate that a blue light  
470 receptor might mediate the main light input signal to the clock. *N. salina* phase response curves  
471 using blue light are similar to the ones observed in the green marine algae *Ostreococcus tauri*  
472 under blue light, and both display stronger advances than delays (Thommen *et al.*, 2015). In  
473 contrast to diatoms, *Nannochloropsis* species lack phytochromes (Vieler *et al.*, 2012) and it is  
474 unclear whether they contain any red light photoreceptors. *N. oceanica* encodes for three  
475 Aureochrome genes (Vieler *et al.*, 2012). Aureochromes are stramenopile specific  
476 photoreceptors that have been shown to be involved in blue light mediated photomorphogenesis  
477 in the *Vaucheria* genus and in the induction of cell division by blue light in diatoms (Kroth *et al.*,  
478 2017, Takahashi *et al.*, 2007). Marine waters are enriched in blue light since light of longer wave  
479 lengths cannot penetrate water efficiently (Kirk 2011, Ragni and Ribera D'Alcalà 2004) and  
480 therefore blue light is likely to play a key role in signaling in marine organisms. Aureochromes  
481 contain conserved bZIP DNA-binding and LOV light-sensing motifs (Takahashi *et al.*, 2007),  
482 dimerize, and their DNA binding affinity is modulated by light exposure (Banerjee *et al.*, 2016,  
483 Heintz and Schlichting 2016, Herman *et al.*, 2013, Hisatomi *et al.*, 2013). Future studies will  
484 define the role of Aureochromes in the light input to the clock in stramenopiles.

485

486 No circadian clock components have been identified in the genus *Nannochloropsis*.

487 *Nannochloropsis* species appear to lack clear homologs to plant clock components, although  
488 CCT domain containing proteins are interesting potential regulatory candidates. As other  
489 stramenopiles, *Nannochloropsis* species also encode for several proteins similar to clock  
490 components found in animals. *Nannochloropsis* CPF1 like proteins, as diatom CPF1, show  
491 similarities to 6-4 photolyases in plants and animals as well as to cryptochromes proteins  
492 involved in circadian regulation in insects and mammals (Figure S11). CPF1 from  
493 *Phaeodactylum tricornutum* as well as CPF1 from the green alga *Ostreococcus tauri* are able to



494 inhibit the transcriptional activity of the mouse BMAL-CLOCK complex in a heterologous  
495 system, the same activity as the mouse circadian clock component CRY1 (Coesel *et al.*, 2009,  
496 Heijde *et al.*, 2010). However, although *O. tauri* does not encode for bHLH-PAS proteins, the  
497 presence of bHLH-PAS proteins in stramenopiles suggest that these interactions might be  
498 functionally relevant in stramenopiles.

499

## 500 **Conclusion**

501 Using bioluminescence transcriptional reporters we provide evidence for the presence of  
502 circadian rhythms in *Nannochloropsis* species. The *N. salina* luminescence strains characterized  
503 in this study represent a powerful system for future studies to identify the mechanisms regulating  
504 circadian rhythms in stramenopiles. In addition to the luminescence reporters described in this  
505 study, the recent development of a comprehensive set of molecular tools for *Nannochloropsis*  
506 species (Poliner *et al.*, 2018a) will allow the characterization of the circadian function of the  
507 putative clock genes, the investigation of the role of photoreceptors in entrainment, and the  
508 development of mutant screens to identify lines with compromised rhythms. Future studies on  
509 the clock in stramenopiles will not only improve our understanding of the role of circadian  
510 clocks in the biology of marine phytoplankton but also provide new insight into the evolution  
511 and design principles of circadian oscillators.

512

## 513 **Experimental procedures**

### 514 ***Nannochloropsis* species and growth conditions**

515 The *Nannochloropsis* lines *N. oceanica* CCMP1779, *N. salina* CCMP537, *N. salina*  
516 CCMP1778, and *N. salina* CCMP1776, were originally collected at different latitudes (29°N,  
517 41.6°N, 55.75°N, and 55.75°N respectively) as described at Bigelow National Center for Marine  
518 Algae and Microbiota (Fig. S1). We used the genome sequences and annotation versions  
519 *Nannochloropsis oceanica* CCMP1779 v1.0 (Vieler *et al.*, 2012) available at JGI and  
520 *Nannochloropsis salina* CCMP537 (Wang *et al.*, 2014) available at  
521 <http://www.bioenergychina.org:8989/index.html>. Liquid cultures were grown in flasks in f/2  
522 medium and maintained on a shaker set at 120 rpm. If not otherwise indicated cultures were  
523 grown under white fluorescent lights. Blue and red light treatments were conducted using LED  
524 lights; their spectrum is shown in Figure S14.

525

## 526 **Growth curves**

527 *Nannochloropsis* species were maintained in flasks with f/2 media under  $100 \mu\text{mol m}^{-2} \text{s}^{-1}$   
528 constant white light and entrained under diel conditions (12 h light/12 h dark, at 40 or  $100 \mu\text{mol}$   
529  $\text{m}^{-2} \text{s}^{-1}$ ) for at least 10 days. Each culture was then diluted to make 3 50-mL cultures at the same  
530 cell density and these diluted cultures were grown in the same diel conditions for 24 h before cell  
531 counting began. Cells were counted using a Beckman-Coulter Z2 particle counter.

532

## 533 **Generation of luciferase expressing lines**

534 To generate the pNOC-LUC vector series (Figure S15, Dataset 1) the Gateway-luciferase  
535 cassette from pMDC-LUC+HA (Farre and Kay 2007) and the hygromycin resistance cassette  
536 from pSELECT100 (Vieler *et al.*, 2012) were PCR amplified and combined by Gibson  
537 Assembly. The LDSP terminator (CCMP1779\_4188) was PCR amplified from *N. oceanica*  
538 CCMP1779 genome using the primers LDSP term sac F+ and LDSP term afl R- (Figure S16),  
539 and digested with SacI and AflIII to replace the 35S terminator as the terminator for the luciferase  
540 gene. The LUC+HA gene was then replaced by either *N. oceanica* CCMP1779 codon optimized  
541 coding sequences for firefly luciferase (FLUC) and, nanoluciferase (NLUC) (Hall *et al.*, 2012,  
542 Poliner *et al.*, 2018b) or a Chlamydomonas codon optimized renilla luciferase (RLUC) (Ferrante  
543 *et al.*, 2008) to form pNOC-Fluc, pNOC-Nluc, and pNOC-Rluc respectively using AscI and SacI  
544 and the primers listed in Figure S16. The pNOC vectors were used to transform *N. oceanica*  
545 CCMP1779. Since *N. salina* CCMP537 is resistant to hygromycin, the hygromycin resistance  
546 cassette from the pNOC-GW vectors was replaced by a zeocin resistance cassette (BleC). This  
547 cassette, which includes the CCMP537 EF promoter  
548 (NODE\_7115\_length\_93819\_cov\_37.515949:78382..79716), the zeocin resistance gene and the  
549 CCMP1779 LDSP terminator, from *N. salina* selection construct pNSA-511 were cloned by  
550 restriction digest (AhdI/SbfI) generating the pNSA-FLUC and vector (Dataset 1). The pNSA-511  
551 construct was generated by cloning the CCMP537 EF promoter into pNOC-411 using SnaBI and  
552 XhoI (Poliner *et al.*, 2018b). The promoters of the cellulose synthase (NannoCCMP1779|5780,  
553 NODE\_11401\_length\_57650\_cov\_57.237450:4263..6099), *LHC1*  
554 (NODE\_14101\_length\_22726\_cov\_35.737923:17540..18097), and *LHC8*  
555 (NannoCCMP1779|6809, NODE\_11394\_length\_43512\_cov\_40.897591:1551..2663) promoters

556 were amplified from the *N. oceanica* CCMP1779 and *N. salina* CCMP537 genomes using  
557 primers listed in Figure S16 and inserted into pENTR-D-Topo (Invitrogen). The promoters were  
558 transferred into luciferase reporter destination vectors by an LR clonase reaction (Invitrogen) and  
559 used for transformation.

560

### 561 ***Nannochloropsis* transformation**

562 Promoter reporter vectors were linearized by restriction digest, concentrated by ethanol  
563 precipitation, and resuspended in water. Transformations were conducted as described previously  
564 (Poliner *et al.*, 2018c).

565

### 566 **Immunoblotting**

567 Reporter line 50 ml cultures in *f/2* medium were grown in 250 ml flasks under 12 h /12 h  
568 light/dark cycles, 200  $\mu\text{mol m}^{-2} \text{s}^{-1}$ . Every 3 h, 5 ml aliquots were collected by centrifugation at  
569 4,000 x G for 5 min, after decanting, pellets were transferred to 2 ml round bottom tubes and  
570 centrifuged at 13,000 x G for 30 seconds. After aspiration of the supernatant, pellets were frozen  
571 in liquid nitrogen. Frozen pellets were ground with 3 x 2 mm steel balls at 30 Hz for 2 minutes,  
572 and resuspended in protein extraction buffer (100mM Tris pH 8.0, 2mM PMSF, 2%  $\beta$ -  
573 mercaptoethanol, 4% SDS), heated at 80°C for 3 minutes, and centrifuged at 13,000 x G for 30  
574 seconds. The protein concentration was determined using a RCDC protein quantification kit  
575 (Bio-rad) and equal quantities (50  $\mu\text{g}$ ) of protein were loaded chronologically for the light/dark  
576 timecourse, separated through 3-10% SDS-PAGE and transferred to PVDF membranes. The  
577 FLUC-HA and NLUC-HA proteins were detected with anti HA-HRP antibody (Roche 3F10)  
578 (1:1000) in TBST 5% milk. RLUC was detected with a primary anti-RLUC (MBL Life Sciences  
579 PM047) 1:2000 in TBST 5% BSA and a secondary anti-Rabbit IgG-HRP (Bio-Rad 170-6515;  
580 1:10000) antibody in TBST 5% milk. FLUC and RLUC immunoblots were visualized with  
581 Clarity (Bio-rad) and NLUC visualized with Femto (Thermo Scientific) chemiluminescence  
582 solutions. After visualization immunoblots were stained with Direct Blue 71 protein stain (Hee-  
583 Youn Hong 2000).

584

### 585 **Luminescence assays**

586 *Nannochloropsis* luciferase expressing lines were maintained and entrained under 12 h/12 h  
587 light/dark cycles ( $200 \mu\text{mol m}^{-2} \text{s}^{-1}$ ) if not otherwise indicated in the figure legends.  
588 Luminescence assays were set-up in 96-well plates with 1.5 million cells in  $200 \mu\text{l}$  and  $500 \mu\text{M}$   
589 firefly luciferin (GoldBio), 100X dilution of renilla luciferin (Promega, E2920 Dual-Glo® Stop  
590 & Glo® Reagent), or 10,000X dilution of NanoLuc substrate (Promega, N1110) in f/2 medium  
591 per well. Luminescence assays were conducted with a Centro XS3 LB960 luminometer  
592 (Berthold Technologies) over a 0.3 sec exposure and measurements were collected every hour  
593 using MikroLab software. Bioluminescence experiments include independent cultures from 2-6  
594 (*N. salina* CCMP537) or 3-7 (*N. oceanica* CCMP1779) independent transgenic lines (as  
595 indicated in the figure legend), with the exception of the phase response curve for which data  
596 from cultures from one transgenic *N. salina* CCMP537 *CS::FLUC* line is shown.

597

598 The casein kinase inhibitor PF-670462 (Cayman Chemicals) was resuspended in water at  $2 \text{ mg}$   
599  $\text{ml}^{-1}$ . Pharmacological treatments were prepared using the protocol described above with some  
600 modifications. Replicate wells with equal cell quantities for each treatment and mock were  
601 prepared. Dilutions of the drug at twice the final intended concentration were prepared in the  
602 luciferin f/2 solution and  $100 \mu\text{l}$  added to the respective wells containing  $100 \mu\text{l}$  of cells in f/2.

603

604 For substrate refeeding experiments cultures were entrained and maintained under light/dark  
605 cycles. On the day of the experiment duplicate wells with equal cell densities and luciferin were  
606 prepared. Luminescence measurements were collected every hour. After 48 h in order to restore  
607 the starting concentration of substrate,  $20 \mu\text{l}$  of f/2 and 10X concentrated substrate ( $10 \text{ mM}$   
608 firefly luciferin, 1,000X dilution of NanoLuc Dual-Glo reagent, Promega) were added to the  
609 respective wells.

610

### 611 **Statistical analyses**

612 Rhythmicity was quantified using tools on Biodare 2 (<https://biodare2.ed.ac.uk/>)(Moore *et al.*,  
613 2014). If not otherwise indicated in the figure legend, the raw bioluminescence traces were first  
614 detrended by subtracting a +12/-12 h moving average. To correct for damping effects, each of  
615 the resulted data points was divided by the standard deviation of the corresponding +12/-12 h  
616 moving window. This procedure is similar as one previously reported for damping circadian

617 oscillations (Izumo *et al.*, 2006). Period length was estimated using FFT-NLS on the detrended  
618 data (Plautz *et al.*, 1997). We defined a trace as rhythmic with a circadian type period when the  
619 period length estimated with FFT-NLS was within 3 h of the estimate provided by either Enright  
620 Periodogram (ERP)(Enright 1965) or Maximum Entropy Spectral Analysis (MESA) (Burg  
621 1972), and the FFT-NLS Relative Amplitude Error was  $< 0.7$ , the Period Error  $< 2$  and the  
622 Goodness Of Fit  $< 0.8$ . A good fit was further confirmed by visual inspection of the trace. For T6  
623 experiments, traces periods of  $\sim 6$ h were considered "not rhythmic", since there was not apparent  
624 circadian component. Other statistical analyses were implemented in GraphPad Prism.

625

### 626 **Phylogenetic analysis**

627 Protein sequences derived from the *N. oceanica* CCMP1779 and *N. salina* gene models and  
628 related protein sequences were used to generate a multiple sequence alignment using the  
629 Molecular Evolutionary Genetics Analysis 7 (MEGA7) program (Kumar *et al.*, 2016) and the  
630 Multiple Sequence Comparison by Log-Expectation (MUSCLE) algorithm (Edgar 2004). The  
631 alignment file was used to create a neighbor-joining method phylogenetic tree with 1000 rounds  
632 of bootstrapping.

633

### 634 **Acknowledgments**

635 We thank Hideki Takahashi for the anti-Renilla antibody, Christoph Benning for the access to  
636 the cell counter, and Stephanie Taylor for discussions and advice on the analyses of cyclic  
637 expression. We also thank Traverse Cottrell for technical assistance. This work was funded by a  
638 grant from the National Science Foundation (IOS-1354721) to E.M.F. The authors have no  
639 conflict of interest to declare.

640

### 641 **Short legends for supporting information**

642 **Figure S1.** Collection location of the *Nannochloropsis* strains used in this study.

643 **Figure S2.** Cell division in *Nannochloropsis* species under light/dark and constant light  
644 conditions.

645 **Figure S3.** Effect of refeeding luciferase substrates on *in vivo* luminescence in *N. oceanica*  
646 CCMP1779.

647 **Figure S4.** Overview of the period estimation analyses using Biodare2.

- 648 **Figure S5.** *In vivo* bioluminescence of *CS::FLUC* expressing lines in constant dark.
- 649 **Figure S6.** Rhythms of *N. oceanica CS::FLUC* expression under constant light under different  
650 temperatures
- 651 **Figure S7.** Bioluminescence rhythms under T6 cycles.
- 652 **Figure S8.** Phase response curve of *CS::FLUC* rhythms in *N. salina* under blue or red light.
- 653 **Figure S9.** CCT protein domains across taxa.
- 654 **Figure S10.** Expression of *N. oceanica* CCMP1779 CCT and bHLH-PAS genes under diel  
655 cycles.
- 656 **Figure S11.** Phylogenetic analysis of *N. oceanica* (CCMP1779) and *N. salina* (CCMP537)  
657 cryptochrome/photolyase proteins.
- 658 **Figure S12.** Comparison of bHLH-PAS domains across taxa.
- 659 **Figure S13.** Modulation of *CS::FLUC* rhythms by a CK1 $\epsilon/\delta$  inhibitor.
- 660 **Figure S14.** Spectrum of red and blue light sources.
- 661 **Figure S15.** Graphical representation of luciferase reporter vectors for *Nannochloropsis* species.
- 662 **Figure S16.** Primers used in this study.
- 663 **Dataset 1.** Plasmid sequences of constructs used in this study.

664

## 665 **References**

666

- 667 **Anderson, R.W., Laval-Martin, D.L. and Edmunds, L.N., Jr.** (1985) Cell cycle oscillators.  
668 Temperature compensation of the circadian rhythm of cell division in *Euglena*. *Exp. Cell*  
669 *Res.*, **157**, 144-158.
- 670 **Andreu, N., Zelmer, A., Fletcher, T., Elkington, P.T., Ward, T.H., Ripoll, J., Parish, T.,**  
671 **Bancroft, G.J., Schaible, U., Robertson, B.D. and Wiles, S.** (2010) Optimisation of  
672 bioluminescent reporters for use with mycobacteria. *PLoS ONE*, **5**, e10777.
- 673 **Aschoff, J.** (1999) Masking and parametric effects of high-frequency light-dark cycles. *Jpn. J.*  
674 *Physiol.*, **49**, 11-18.
- 675 **Ashworth, J., Coesel, S., Lee, A., Armbrust, E.V., Orellana, M.V. and Baliga, N.S.** (2013)  
676 Genome-wide diel growth state transitions in the diatom *Thalassiosira pseudonana*. *Proc.*  
677 *Natl. Acad. Sci. U. S. A.*, **110**, 7518-7523.
- 678 **Badura, L., Swanson, T., Adamowicz, W., Adams, J., Cianfrogna, J., Fisher, K., Holland,**  
679 **J., Kleiman, R., Nelson, F., Reynolds, L., St Germain, K., Schaeffer, E., Tate, B. and**

- 680 **Sprouse, J.** (2007) An inhibitor of casein kinase I epsilon induces phase delays in  
681 circadian rhythms under free-running and entrained conditions. *J. Pharmacol. Exp. Ther.*,  
682 **322**, 730-738.
- 683 **Banerjee, A., Herman, E., Serif, M., Maestre-Reyna, M., Hepp, S., Pokorny, R., Kroth,**  
684 **P.G., Essen, L.O. and Kottke, T.** (2016) Allosteric communication between DNA-  
685 binding and light-responsive domains of diatom class I aureochromes. *Nucleic Acids*  
686 *Res.*, **44**, 5957-5970.
- 687 **Bargiello, T.A., Jackson, F.R. and Young, M.W.** (1984) Restoration of circadian behavioural  
688 rhythms by gene transfer in *Drosophila*. *Nature*, **312**, 752-754.
- 689 **Bell-Pedersen, D., Cassone, V.M., Earnest, D.J., Golden, S.S., Hardin, P.E., Thomas, T.L.**  
690 **and Zoran, M.J.** (2005) Circadian rhythms from multiple oscillators: lessons from  
691 diverse organisms. *Nat. Rev. Genet.*, **6**, 544-556.
- 692 **Biller, S.J., Coe, A., Roggensack, S.E. and Chisholm, S.W.** (2018) Heterotroph Interactions  
693 Alter *Prochlorococcus* Transcriptome Dynamics during Extended Periods of Darkness.  
694 *mSystems*, **3**.
- 695 **Bordyugov, G., Abraham, U., Granada, A., Rose, P., Imkeller, K., Kramer, A. and Herzel,**  
696 **H.** (2015) Tuning the phase of circadian entrainment. *J R Soc Interface*, **12**, 20150282.
- 697 **Braun, R., Farre, E.M., Schurr, U. and Matsubara, S.** (2014) Effects of light and circadian  
698 clock on growth and chlorophyll accumulation of *Nannochloropsis gaditana*. *J. Phycol.*,  
699 **50**, 515-525.
- 700 **Burg, J.P.** (1972) The Relationship Between Maximum Entropy Spectra And Maximum  
701 Likelihood Spectra†. *Geophysics*, **37**, 375-376.
- 702 **Burki, F.** (2014) The eukaryotic tree of life from a global phylogenomic perspective. *Cold*  
703 *Spring Harb Perspect Biol*, **6**, a016147.
- 704 **Chauton, M.S., Winge, P., Brembu, T., Vadstein, O. and Bones, A.M.** (2013) Gene  
705 Regulation of Carbon Fixation, Storage, and Utilization in the Diatom *Phaeodactylum*  
706 *tricornutum* Acclimated to Light/Dark Cycles. *Plant Physiol.* , **161**, 1034-1048.
- 707 **Coesel, S., Mangogna, M., Ishikawa, T., Heijde, M., Rogato, A., Finazzi, G., Todo, T.,**  
708 **Bowler, C. and Falciatore, A.** (2009) Diatom PtCPF1 is a new cryptochrome/photolyase  
709 family member with DNA repair and transcription regulation activity. *EMBO Rep.*, **10**,  
710 655-661.

- 711 **Cohen, S.E. and Golden, S.S.** (2015) Circadian Rhythms in Cyanobacteria. *Microbiol. Mol.*  
712 *Biol. Rev.*, **79**, 373-385.
- 713 **Corellou, F., Schwartz, C., Motta, J.P., Djouani-Tahri el, B., Sanchez, F. and Bouget, F.Y.**  
714 (2009) Clocks in the green lineage: comparative functional analysis of the circadian  
715 architecture of the picoeukaryote *ostreococcus*. *Plant Cell*, **21**, 3436-3449.
- 716 **Corteggiani Carpinelli, E., Telatin, A., Vitulo, N., Forcato, C., D'Angelo, M., Schiavon, R.,**  
717 **Vezi, A., Giacometti, G.M., Morosinotto, T. and Valle, G.** (2014) Chromosome scale  
718 genome assembly and transcriptome profiling of *Nannochloropsis gaditana* in nitrogen  
719 depletion. *Molecular plant*, **7**, 323-335.
- 720 **Crane, B.R. and Young, M.W.** (2014) Interactive features of proteins composing eukaryotic  
721 circadian clocks. *Annu. Rev. Biochem.*, **83**, 191-219.
- 722 **Dodd, A.N., Parkinson, K. and Webb, A.A.R.** (2004) Independent circadian regulation of  
723 assimilation and stomatal conductance in the *ztl-1* mutant of *Arabidopsis*. *New Phytol.*,  
724 **162**, 1469-8137.
- 725 **Dodd, A.N., Salathia, N., Hall, A., Kevei, E., Toth, R., Nagy, F., Hibberd, J.M., Millar, A.J.**  
726 **and Webb, A.A.** (2005) Plant circadian clocks increase photosynthesis, growth, survival,  
727 and competitive advantage. *Science*, **309**, 630-633.
- 728 **Doherty, C.J. and Kay, S.A.** (2010) Circadian control of global gene expression patterns. *Annu.*  
729 *Rev. Genet.*, **44**, 419-444.
- 730 **Dunlap, J.C. and Loros, J.J.** (2017) Making Time: Conservation of Biological Clocks from  
731 Fungi to Animals. *Microbiol Spectr*, **5**.
- 732 **Edgar, R.C.** (2004) MUSCLE: multiple sequence alignment with high accuracy and high  
733 throughput. *Nucleic Acids Res.*, **32**, 1792-1797.
- 734 **Eide, E.J., Woolf, M.F., Kang, H., Woolf, P., Hurst, W., Camacho, F., Vielhaber, E.L.,**  
735 **Giovanni, A. and Virshup, D.M.** (2005) Control of mammalian circadian rhythm by  
736 CKIepsilon-regulated proteasome-mediated PER2 degradation. *Mol. Cell. Biol.*, **25**,  
737 2795-2807.
- 738 **England, C.G., Ehlerding, E.B. and Cai, W.** (2016) NanoLuc: A Small Luciferase Is  
739 Brightening Up the Field of Bioluminescence. *Bioconjug. Chem.*, **27**, 1175-1187.
- 740 **Enright, J.T.** (1965) The search for rhythmicity in biological time-series. *J. Theor. Biol.*, **8**, 426-  
741 468.



- 742 **Farre, E.M. and Kay, S.A.** (2007) PRR7 protein levels are regulated by light and the circadian  
743 clock in Arabidopsis. *Plant J.*, **52**, 548-560.
- 744 **Farre, E.M. and Liu, T.** (2013) The PRR family of transcriptional regulators reflects the  
745 complexity and evolution of plant circadian clocks. *Curr. Opin. Plant Biol.*, **16**, 621-629.
- 746 **Ferrante, P., Catalanotti, C., Bonente, G. and Giuliano, G.** (2008) An optimized, chemically  
747 regulated gene expression system for Chlamydomonas. *PLoS ONE*, **3**, e3200.
- 748 **Gehan, M.A., Greenham, K., Mockler, T.C. and McClung, C.R.** (2015) Transcriptional  
749 networks-crops, clocks, and abiotic stress. *Curr. Opin. Plant Biol.*, **24**, 39-46.
- 750 **Goto, K. and Johnson, C.H.** (1995) Is the cell division cycle gated by a circadian clock? The  
751 case of Chlamydomonas reinhardtii. *J. Cell Biol.*, **129**, 1061-1069.
- 752 **Goya, M.E., Romanowski, A., Caldart, C.S., Benard, C.Y. and Golombek, D.A.** (2016)  
753 Circadian rhythms identified in Caenorhabditis elegans by in vivo long-term monitoring  
754 of a bioluminescent reporter. *Proc. Natl. Acad. Sci. U. S. A.*, **113**, E7837-E7845.
- 755 **Gravot, A., Dittami, S.M., Rousvoal, S., Lugan, R., Eggert, A., Collen, J., Boyen, C.,**  
756 **Bouchereau, A. and Tonon, T.** (2010) Diurnal oscillations of metabolite abundances  
757 and gene analysis provide new insights into central metabolic processes of the brown alga  
758 Ectocarpus siliculosus. *New Phytol.*, **188**, 98-110.
- 759 **Gyllenstrand, N., Karlgren, A., Clapham, D., Holm, K., Hall, A., Gould, P.D., Kallman, T.**  
760 **and Lagercrantz, U.** (2014) No time for spruce: rapid dampening of circadian rhythms  
761 in Picea abies (L. Karst). *Plant Cell Physiol.*, **55**, 535-550.
- 762 **Hall, M.P., Unch, J., Binkowski, B.F., Valley, M.P., Butler, B.L., Wood, M.G., Otto, P.,**  
763 **Zimmerman, K., Vidugiris, G., Machleidt, T., Robers, M.B., Benink, H.A., Eggers,**  
764 **C.T., Slater, M.R., Meisenheimer, P.L., Klaubert, D.H., Fan, F., Encell, L.P. and**  
765 **Wood, K.V.** (2012) Engineered luciferase reporter from a deep sea shrimp utilizing a  
766 novel imidazopyrazinone substrate. *ACS Chem Biol.*, **7**, 1848-1857.
- 767 **Hee-Youn Hong, G.-S.Y.J.-K.C.** (2000) Direct Blue 71 staining of proteins bound to blotting  
768 membranes. *Electrophoresis*, **21**, 841-845.
- 769 **Heijde, M., Zabulon, G., Corellou, F., Ishikawa, T., Brazard, J., Usman, A., Sanchez, F.,**  
770 **Plaza, P., Martin, M., Falciatore, A., Todo, T., Bouget, F.Y. and Bowler, C.** (2010)  
771 Characterization of two members of the cryptochrome/photolyase family from  
772 *Ostreococcus tauri* provides insights into the origin and evolution of cryptochromes.

- 773 *Plant Cell Environ.*, **33**, 1614-1626.
- 774 **Heintz, U. and Schlichting, I.** (2016) Blue light-induced LOV domain dimerization enhances  
775 the affinity of Aureochrome 1a for its target DNA sequence. *eLife*, **5**, e11860.
- 776 **Herman, E., Sachse, M., Kroth, P.G. and Kottke, T.** (2013) Blue-light-induced unfolding of  
777 the Jalpha helix allows for the dimerization of aureochrome-LOV from the diatom  
778 *Phaeodactylum tricornutum*. *Biochemistry*, **52**, 3094-3101.
- 779 **Hevia, M.A., Canessa, P., Muller-Esparza, H. and Larrondo, L.F.** (2015) A circadian  
780 oscillator in the fungus *Botrytis cinerea* regulates virulence when infecting *Arabidopsis*  
781 *thaliana*. *Proc. Natl. Acad. Sci. U. S. A.*, **112**, 8744-8749.
- 782 **Hisatomi, O., Takeuchi, K., Zikihara, K., Ookubo, Y., Nakatani, Y., Takahashi, F.,**  
783 **Tokutomi, S. and Kataoka, H.** (2013) Blue light-induced conformational changes in a  
784 light-regulated transcription factor, aureochrome-1. *Plant Cell Physiol.*, **54**, 93-106.
- 785 **Holtzendorff, J., Partensky, F., Mella, D., Lennon, J.F., Hess, W.R. and Garczarek, L.**  
786 (2008) Genome streamlining results in loss of robustness of the circadian clock in the  
787 marine cyanobacterium *Prochlorococcus marinus* PCC 9511. *J. Biol. Rhythms*, **23**, 187-  
788 199.
- 789 **Hurley, J.M., Dasgupta, A., Emerson, J.M., Zhou, X., Ringelberg, C.S., Knabe, N., Lipzen,**  
790 **A.M., Lindquist, E.A., Daum, C.G., Barry, K.W., Grigoriev, I.V., Smith, K.M.,**  
791 **Galagan, J.E., Bell-Pedersen, D., Freitag, M., Cheng, C., Loros, J.J. and Dunlap,**  
792 **J.C.** (2014) Analysis of clock-regulated genes in *Neurospora* reveals widespread  
793 posttranscriptional control of metabolic potential. *Proc. Natl. Acad. Sci. U. S. A.*, **111**,  
794 16995-17002.
- 795 **Izumo, M., Sato, T.R., Straume, M. and Johnson, C.H.** (2006) Quantitative analyses of  
796 circadian gene expression in mammalian cell cultures. *PLoS Comput. Biol.*, **2**, e136.
- 797 **Johnson, C.H.** (2010) Circadian clocks and cell division: what's the pacemaker? *Cell Cycle*, **9**,  
798 3864-3873.
- 799 **Johnson, C.H., Elliott, J.A. and Foster, R.** (2003) Entrainment of circadian programs.  
800 *Chronobiol. Int.*, **20**, 741-774.
- 801 **Kilian, O., Benemann, C.S.E., Niyogi, K.K. and Vick, B.** (2011) High-efficiency homologous  
802 recombination in the oil-producing alga *Nannochloropsis* sp. *Proc. Natl. Acad. Sci. U. S.*  
803 *A.*, **108**, 21265-21269.

- 804 **Kirk, J.T.O.** (2011) *Light and photosynthesis in aquatic ecosystems* Third edn. Cambridge:  
805 Cambridge University Press.
- 806 **Kroth, P.G., Wilhelm, C. and Kottke, T.** (2017) An update on aureochromes: Phylogeny -  
807 mechanism - function. *J. Plant Physiol.*, **217**, 20-26.
- 808 **Kumar, S., Stecher, G. and Tamura, K.** (2016) MEGA7: Molecular Evolutionary Genetics  
809 Analysis Version 7.0 for Bigger Datasets. *Mol. Biol. Evol.*, **33**, 1870-1874.
- 810 **Kusakina, J., Gould, P.D. and Hall, A.** (2014) A fast circadian clock at high temperatures is a  
811 conserved feature across Arabidopsis accessions and likely to be important for vegetative  
812 yield. *Plant Cell Environ.*, **37**, 327-340.
- 813 **Lee, S.J., Kong, M., Morse, D. and Hijri, M.** (2018) Expression of putative circadian clock  
814 components in the arbuscular mycorrhizal fungus *Rhizoglyphus irregularis*. *Mycorrhiza*.
- 815 **Leitao, J.M. and Esteves da Silva, J.C.** (2010) Firefly luciferase inhibition. *Journal of*  
816 *photochemistry and photobiology. B, Biology*, **101**, 1-8.
- 817 **Linde, A.M., Eklund, D.M., Kubota, A., Pederson, E.R., Holm, K., Gyllenstrand, N.,**  
818 **Nishihama, R., Cronberg, N., Muranaka, T., Oyama, T., Kohchi, T. and**  
819 **Lagercrantz, U.** (2017) Early evolution of the land plant circadian clock. *New Phytol.*
- 820 **Makarov, V.N., Schoschina, E.V. and Luning, K.** (1995) Diurnal and circadian periodicity of  
821 mitosis and growth in marine macroalgae. I. Juvenile sporophytes of Laminariales  
822 (Phaeophyta). *Eur. J. Phycol.*, **30**, 261-266.
- 823 **Meng, Q.J., Maywood, E.S., Bechtold, D.A., Lu, W.Q., Li, J., Gibbs, J.E., Dupre, S.M.,**  
824 **Chesham, J.E., Rajamohan, F., Knafels, J., Sneed, B., Zawadzke, L.E., Ohren, J.F.,**  
825 **Walton, K.M., Wager, T.T., Hastings, M.H. and Loudon, A.S.** (2010) Entrainment of  
826 disrupted circadian behavior through inhibition of casein kinase 1 (CK1) enzymes. *Proc.*  
827 *Natl. Acad. Sci. U. S. A.*, **107**, 15240-15245.
- 828 **Millar, A.J., Short, S.R., Chua, N.H. and Kay, S.A.** (1992) A Novel Circadian Phenotype  
829 Based on Firefly Luciferase Expression in Transgenic Plants. *Plant Cell*, **4**, 1075-1087.
- 830 **Miyagishima, S.Y., Fujiwara, T., Sumiya, N., Hirooka, S., Nakano, A., Kabeya, Y. and**  
831 **Nakamura, M.** (2014) Translation-independent circadian control of the cell cycle in a  
832 unicellular photosynthetic eukaryote. *Nat Commun*, **5**, 3807.
- 833 **Moore, A., Zielinski, T. and Millar, A.J.** (2014) Online period estimation and determination of  
834 rhythmicity in circadian data, using the BioDare data infrastructure. *Methods Mol. Biol.*,

- 835           **1158**, 13-44.
- 836 **Morse, D., Milos, P.M., Roux, E. and Hastings, J.W.** (1989) Circadian regulation of  
837 bioluminescence in *Gonyaulax* involves translational control. *Proc. Natl. Acad. Sci. U. S.*  
838 *A.*, **86**, 172-176.
- 839 **Morse, D.S., Fritz, L. and Hastings, J.W.** (1990) What is the clock? Translational regulation of  
840 circadian bioluminescence. *Trends Biochem. Sci.*, **15**, 262-265.
- 841 **Moulager, M., Corellou, F., Verge, V., Escande, M.L. and Bouget, F.Y.** (2010) Integration of  
842 light signals by the retinoblastoma pathway in the control of S phase entry in the  
843 picophytoplanktonic cell *Ostreococcus*. *PLoS Genet.*, **6**, e1000957.
- 844 **Moulager, M., Monnier, A., Jesson, B., Bouvet, R., Mosser, J., Schwartz, C., Garnier, L.,**  
845 **Corellou, F. and Bouget, F.Y.** (2007) Light-dependent regulation of cell division in  
846 *Ostreococcus*: evidence for a major transcriptional input. *Plant Physiol.* , **144**, 1360-1369.
- 847 **Mullineaux, C.W. and Stanewsky, R.** (2009) The rolex and the hourglass: a simplified  
848 circadian clock in prochlorococcus? *J. Bacteriol.*, **191**, 5333-5335.
- 849 **Nikaido, S.S. and Johnson, C.H.** (2000) Daily and circadian variation in survival from  
850 ultraviolet radiation in *Chlamydomonas reinhardtii*. *Photochem. Photobiol.*, **71**, 758-765.
- 851 **Noordally, Z.B. and Millar, A.J.** (2015) Clocks in algae. *Biochemistry*, **54**, 171-183.
- 852 **O'Neill, J.S., van Ooijen, G., Dixon, L.E., Troein, C., Corellou, F., Bouget, F.Y., Reddy,**  
853 **A.B. and Millar, A.J.** (2011) Circadian rhythms persist without transcription in a  
854 eukaryote. *Nature*, **469**, 554-558.
- 855 **Ohta, H., Yamazaki, S. and McMahon, D.G.** (2005) Constant light desynchronizes  
856 mammalian clock neurons. *Nat. Neurosci.*, **8**, 267-269.
- 857 **Olivares-Yanez, C., Emerson, J., Kettenbach, A., Loros, J.J., Dunlap, J.C. and Larrondo,**  
858 **L.F.** (2016) Modulation of Circadian Gene Expression and Metabolic Compensation by  
859 the RCO-1 Corepressor of *Neurospora crassa*. *Genetics*, **204**, 163-176.
- 860 **Ouyang, Y., Andersson, C.R., Kondo, T., Golden, S.S. and Johnson, C.H.** (1998) Resonating  
861 circadian clocks enhance fitness in cyanobacteria. *Proc. Natl. Acad. Sci. U. S. A.*, **95**,  
862 8660-8664.
- 863 **Pittendrigh, C.S. and Daan, S.** (1976) FUNCTIONAL-ANALYSIS OF CIRCADIAN  
864 PACEMAKERS IN NOCTURNAL RODENTS .5. PACEMAKER STRUCTURE -  
865 CLOCK FOR ALL SEASONS. *J. Comp. Physiol.*, **106**, 333-355.

- 866 **Plautz, J.D., Straume, M., Stanewsky, R., Jamison, C.F., Brandes, C., Dowse, H.B., Hall,**  
867 **J.C. and Kay, S.A.** (1997) Quantitative analysis of *Drosophila* period gene transcription  
868 in living animals. *J. Biol. Rhythms*, **12**, 204-217.
- 869 **Poliner, E., Farre, E.M. and Benning, C.** (2018a) Advanced genetic tools enable synthetic  
870 biology in the oleaginous microalgae *Nannochloropsis* sp. *Plant Cell Rep.*, **37**, 1383-  
871 1399.
- 872 **Poliner, E., Panchy, N., Newton, L., Wu, G., Lapinsky, A., Bullard, B., Zienkiewicz, A.,**  
873 **Benning, C., Shiu, S.H. and Farre, E.M.** (2015) Transcriptional coordination of  
874 physiological responses in *Nannochloropsis oceanica* CCMP1779 under light/dark  
875 cycles. *Plant J.*, **83**, 1097-1113.
- 876 **Poliner, E., Pulman, J.A., Zienkiewicz, K., Childs, K., Benning, C. and Farre, E.M.** (2018b)  
877 A toolkit for *Nannochloropsis oceanica* CCMP1779 enables gene stacking and genetic  
878 engineering of the eicosapentaenoic acid pathway for enhanced long-chain  
879 polyunsaturated fatty acid production. *Plant biotechnology journal*, **16**, 298-309.
- 880 **Poliner, E., Takeuchi, T., Du, Z.Y., Benning, C. and Farre, E.M.** (2018c) Nontransgenic  
881 Marker-Free Gene Disruption by an Episomal CRISPR System in the Oleaginous  
882 Microalga, *Nannochloropsis oceanica* CCMP1779. *ACS Synth Biol*, **7**, 962-968.
- 883 **Querfurth, C., Diernfellner, A.C., Gin, E., Malzahn, E., Hofer, T. and Brunner, M.** (2011)  
884 Circadian conformational change of the *Neurospora* clock protein FREQUENCY  
885 triggered by clustered hyperphosphorylation of a basic domain. *Mol. Cell*, **43**, 713-722.
- 886 **Radakovits, R., Jinkerson, R.E., Fuerstenberg, S.I., Tae, H., Settlage, R.E., Boore, J.L. and**  
887 **Posewitz, M.C.** (2012) Draft genome sequence and genetic transformation of the  
888 oleaginous alga *Nannochloropsis gaditana*. *Nat Commun*, **3**, 686.
- 889 **Ragni, M. and D'alcala, M.R.** (2007) Circadian variability in the photobiology of  
890 *Phaeodactylum tricornutum*: pigment content. *J. Plankton Res.*, **29**, 141-156.
- 891 **Ragni, M. and Ribera D'Alcalà, M.** (2004) Light as an information carrier underwater. *J.*  
892 *Plankton Res.*, **26**, 433-443.
- 893 **Rensing, L. and Ruoff, P.** (2002) Temperature effect on entrainment, phase shifting, and  
894 amplitude of circadian clocks and its molecular bases. *Chronobiol. Int.*, **19**, 807-864.
- 895 **Roenneberg, T., Dragovic, Z. and Merrow, M.** (2005) Demasking biological oscillators:  
896 properties and principles of entrainment exemplified by the *Neurospora* circadian clock.

- 897 *Proc. Natl. Acad. Sci. U. S. A.*, **102**, 7742-7747.
- 898 **Roy, S., Beauchemin, M., Dagenais-Bellefeuille, S., Letourneau, L., Cappadocia, M. and**  
899 **Morse, D.** (2014) The Lingulodinium circadian system lacks rhythmic changes in  
900 transcript abundance. *BMC Biol*, **12**, 107.
- 901 **Rynearson, T.A. and Palenik, B.** (2011) *Learning to read the oceans: genomics of marine*  
902 *phytoplankton* first edn. London: Academic Press.
- 903 **Schmelling, N.M., Lehmann, R., Chaudhury, P., Beck, C., Albers, S.V., Axmann, I.M. and**  
904 **Wiegand, A.** (2017) Minimal tool set for a prokaryotic circadian clock. *BMC Evol. Biol.*,  
905 **17**, 169.
- 906 **Schmid, R. and Dring, M.J.** (1992) Circadian rhythm and fast responses to blue light of  
907 photosynthesis in Ectocarpus (Phaeophyta, Ectocarpales) : I. Characterization of the  
908 rhythm and the blue-light response. *Planta* **187**, 53-59.
- 909 **Schmid, R., Forster, R. and Dring, M.J.** (1992) Circadian rhythm and fast responses to blue  
910 light of photosynthesis in Ectocarpus (Phaeophyta, Ectocarpales) : II. Light and CO<sub>2</sub>  
911 dependence of photosynthesis. *Planta* **187**, 60-66.
- 912 **Schneider, K., Perrino, S., Oelhafen, K., Li, S., Zatzepin, A., Lakin-Thomas, P. and Brody,**  
913 **S.** (2009) Rhythmic conidiation in constant light in vivid mutants of *Neurospora crassa*.  
914 *Genetics*, **181**, 917-931.
- 915 **Schwartz, A.S., Brown, R., Ajjawi, I., McCarren, J., Atilla, S., Bauman, N. and**  
916 **Richardson, T.H.** (2018) Complete Genome Sequence of the Model Oleaginous Alga  
917 *Nannochloropsis gaditana* CCMP1894. *Genome Announc*, **6**.
- 918 **Serrano, G., Herrera-Palau, R., Romero, J.M., Serrano, A., Coupland, G. and Valverde, F.**  
919 (2009) *Chlamydomonas* CONSTANS and the evolution of plant photoperiodic signaling.  
920 *Curr. Biol.*, **19**, 359-368.
- 921 **Smith, S.R., Gillard, J.T., Kustka, A.B., McCrow, J.P., Badger, J.H., Zheng, H., New, A.M.,**  
922 **Dupont, C.L., Obata, T., Fernie, A.R. and Allen, A.E.** (2016) Transcriptional  
923 Orchestration of the Global Cellular Response of a Model Pennate Diatom to Diel Light  
924 Cycling under Iron Limitation. *PLoS Genet.*, **12**, e1006490.
- 925 **Takahashi, F., Yamagata, D., Ishikawa, M., Fukamatsu, Y., Ogura, Y., Kasahara, M.,**  
926 **Kiyosue, T., Kikuyama, M., Wada, M. and Kataoka, H.** (2007) AUREOCHROME, a  
927 photoreceptor required for photomorphogenesis in stramenopiles. *Proc. Natl. Acad. Sci.*

- 928 *U. S. A.*, **104**, 19625-19630.
- 929 **Tei, H., Okamura, H., Shigeyoshi, Y., Fukuhara, C., Ozawa, R., Hirose, M. and Sakaki, Y.**  
930 (1997) Circadian oscillation of a mammalian homologue of the *Drosophila* period gene.  
931 *Nature*, **389**, 512-516.
- 932 **Thiriet-Rupert, S., Carrier, G., Chenais, B., Trottier, C., Bougaran, G., Cadoret, J.P.,**  
933 **Schoefs, B. and Saint-Jean, B.** (2016) Transcription factors in microalgae: genome-wide  
934 prediction and comparative analysis. *BMC Genomics*, **17**, 282.
- 935 **Thommen, Q., Pfeuty, B., Schatt, P., Bijoux, A., Bouget, F.Y. and Lefranc, M.** (2015)  
936 Probing entrainment of *Ostreococcus tauri* circadian clock by green and blue light  
937 through a mathematical modeling approach. *Front Genet*, **6**, 65.
- 938 **van Ooijen, G., Hindle, M., Martin, S.F., Barrios-Llerena, M., Sanchez, F., Bouget, F.Y.,**  
939 **O'Neill, J.S., Le Bihan, T. and Millar, A.J.** (2013) Functional analysis of Casein Kinase  
940 1 in a minimal circadian system. *PLoS ONE*, **8**, e70021.
- 941 **Verruto, J., Francis, K., Wang, Y., Low, M.C., Greiner, J., Tacke, S., Kuzminov, F.,**  
942 **Lambert, W., McCarren, J., Ajjawi, I., Bauman, N., Kalb, R., Hannum, G. and**  
943 **Moellering, E.R.** (2018) Unrestrained markerless trait stacking in *Nannochloropsis*  
944 *gaditana* through combined genome editing and marker recycling technologies. *Proc.*  
945 *Natl. Acad. Sci. U. S. A.*, **115**, E7015-E7022.
- 946 **Vieler, A., Wu, G., Tsai, C.H., Bullard, B., Cornish, A.J., Harvey, C., Reca, I.B.,**  
947 **Thornburg, C., Achawanantakun, R., Buehl, C.J., Campbell, M.S., Cavalier, D.,**  
948 **Childs, K.L., Clark, T.J., Deshpande, R., Erickson, E., Armenia Ferguson, A.,**  
949 **Handee, W., Kong, Q., Li, X., Liu, B., Lundback, S., Peng, C., Roston, R.L.,**  
950 **Sanjaya, Simpson, J.P., Terbush, A., Warakanont, J., Zauner, S., Farre, E.M.,**  
951 **Hegg, E.L., Jiang, N., Kuo, M.H., Lu, Y., Niyogi, K.K., Ohlrogge, J., Osteryoung,**  
952 **K.W., Shachar-Hill, Y., Sears, B.B., Sun, Y., Takahashi, H., Yandell, M., Shiu, S.H.**  
953 **and Benning, C.** (2012) Genome, functional gene annotation, and nuclear transformation  
954 of the heterokont oleaginous alga *Nannochloropsis oceanica* CCMP1779. *PLoS Genet.*, **8**,  
955 e1003064.
- 956 **Walton, K.M., Fisher, K., Rubitski, D., Marconi, M., Meng, Q.J., Sladek, M., Adams, J.,**  
957 **Bass, M., Chandrasekaran, R., Butler, T., Griffor, M., Rajamohan, F., Serpa, M.,**  
958 **Chen, Y., Claffey, M., Hastings, M., Loudon, A., Maywood, E., Ohren, J., Doran, A.**

- 959           **and Wager, T.T.** (2009) Selective inhibition of casein kinase 1 epsilon minimally alters  
960           circadian clock period. *J. Pharmacol. Exp. Ther.*, **330**, 430-439.
- 961   **Wang, D., Ning, K., Li, J., Hu, J., Han, D., Wang, H., Zeng, X., Jing, X., Zhou, Q., Su, X.,**  
962           **Chang, X., Wang, A., Wang, W., Jia, J., Wei, L., Xin, Y., Qiao, Y., Huang, R., Chen,**  
963           **J., Han, B., Yoon, K., Hill, R.T., Zohar, Y., Chen, F., Hu, Q. and Xu, J.** (2014)  
964           Nannochloropsis genomes reveal evolution of microalgal oleaginous traits. *PLoS Genet.*,  
965           **10**, e1004094.
- 966   **Wang, Q., Lu, Y., Xin, Y., Wei, L., Huang, S. and Xu, J.** (2016) Genome editing of model  
967           oleaginous microalgae *Nannochloropsis* spp. by CRISPR/Cas9. *Plant J.*, **88**, 1071-1081.
- 968   **Wei, L., Xin, Y., Wang, Q., Yang, J., Hu, H. and Xu, J.** (2017) RNAi-based targeted gene  
969           knockdown in the model oleaginous microalgae *Nannochloropsis oceanica*. *Plant J.*, **89**,  
970           1236-1250.
- 971   **Welsh, D.K., Imaizumi, T. and Kay, S.A.** (2005) Real-time reporting of circadian-regulated  
972           gene expression by luciferase imaging in plants and mammalian cells. *Methods Enzymol.*,  
973           **393**, 269-288.
- 974   **Welsh, D.K. and Kay, S.A.** (2005) Bioluminescence imaging in living organisms. *Curr. Opin.*  
975           *Biotechnol.*, **16**, 73-78.
- 976   **Welsh, D.K., Yoo, S.H., Liu, A.C., Takahashi, J.S. and Kay, S.A.** (2004) Bioluminescence  
977           imaging of individual fibroblasts reveals persistent, independently phased circadian  
978           rhythms of clock gene expression. *Curr. Biol.*, **14**, 2289-2295.
- 979   **Winfree, A.T.** (1974) Suppressing drosophila circadian rhythm with dim light. *Science*, **183**,  
980           970-972.
- 981   **Woelfle, M.A., Ouyang, Y., Phanvijhitsiri, K. and Johnson, C.H.** (2004) The adaptive value  
982           of circadian clocks: an experimental assessment in cyanobacteria. *Curr. Biol.*, **14**, 1481-  
983           1486.
- 984   **Xiang, Q. and Judelson, H.S.** (2014) Myb transcription factors and light regulate sporulation in  
985           the oomycete *Phytophthora infestans*. *PLoS ONE*, **9**, e92086.
- 986   **Yerushalmi, S., Yakir, E. and Green, R.M.** (2011) Circadian clocks and adaptation in  
987           *Arabidopsis*. *Mol. Ecol.*, **20**, 1155-1165.
- 988   **Zehring, W.A., Wheeler, D.A., Reddy, P., Konopka, R.J., Kyriacou, C.P., Rosbash, M. and**  
989           **Hall, J.C.** (1984) P-element transformation with period locus DNA restores rhythmicity



990 to mutant, arrhythmic *Drosophila melanogaster*. *Cell*, **39**, 369-376.

991

992

### 993 **Figure legends**

994 **Figure 1.** Cell division oscillations in *Nannochloropsis* species under light/dark and constant  
995 light conditions. **(a)** Cultures entrained under diel conditions (12 h light/12 h dark,  $100 \mu\text{mol m}^{-2}$   
996  $\text{s}^{-1}$ ) and then moved to constant light ( $40 \mu\text{mol m}^{-2} \text{s}^{-1}$ ). Values are the average  $\pm$  SEM (n=3  
997 cultures) and traces are nudged to aid visualization. **(b)** Cultures grown under diel conditions (12  
998 h light/12 h dark,  $40 \mu\text{mol m}^{-2} \text{s}^{-1}$ ) for 10 days and then released to constant light ( $40 \mu\text{mol m}^{-2} \text{s}^{-1}$ ).  
999 Values are the average  $\pm$  SEM (n=3, *N. salina*; n=2 *N. oceanica*). Grey shading indicates dark  
1000 period. **(c)** Residuals after determining a linear regression of the plots shown in (b) to extract the  
1001 oscillatory component.

1002

1003 **Figure 2.** The development of bioluminescence reporters in *N. oceanica* CCMP1779. **(a)** *In vivo*  
1004 luminescence oscillations of cells expressing *CS::RLUC*, *CS::NLUC*, *CS::FLUC* or  
1005 *LHC8::FLUC* bioluminescence reporters under light/dark cycles. Dark grey shading indicates  
1006 dark period. Luminescence was recorded every hour and the average bioluminescence per  
1007 independent transgenic line  $\pm$  SEM is shown (n=2 cultures). *CS*, cellulose synthase promoter;  
1008 *LHC8*, light harvesting complex 8 promoter; *RLUC*, renilla luciferase; *NLUC*, nanoluciferase;  
1009 *FLUC*, firefly luciferase. **(b)** Representative western blots of the luciferase proteins from the  
1010 transgenic reporter lines shown in **(a)** (top panel) and the blot stained with DB71 as loading  
1011 control (bottom panel) over the course of one light/dark cycle. Light and dark periods are as  
1012 indicated with grey shading in **c**. NLUC and FLUC contain a HA tag and were detected using an  
1013  $\alpha$ -HA antibody. Renilla luciferase was detected using a specific antibody. **(c)** Quantitation of  
1014 luciferase protein, and *in vivo* luminescence of one of the lines shown in (a), and the transcript  
1015 abundance of the respective endogenous gene. Expression was normalized between 0 and 1 and  
1016 the average  $\pm$  SEM (n= 2 cultures) is shown. Transcript abundance data is from RNA-seq  
1017 (Poliner *et al.*, 2015).

1018

1019 **Figure 3.** Bioluminescence oscillations of *N. salina* expressing *CS::FLUC* or *LHC8::FLUC*  
1020 under light/dark cycles. Grey shading indicates dark period. Luminescence was recorded every

1021 hour and the average bioluminescence per independent transgenic line  $\pm$  SEM is shown (n=2).  
1022 *CS*, cellulose synthase promoter; *LHC8*, light harvesting complex 8 promoter; *FLUC*, firefly  
1023 luciferase.

1024

1025 **Figure 4.** *In vivo* bioluminescence oscillations of *CS::FLUC* expressing lines from two  
1026 *Nannochloropsis* species in constant light. Cultures were entrained under cycles of 12 h light/12  
1027 h dark ( $200 \mu\text{mol m}^{-2} \text{s}^{-1}$ ) and  $22^\circ\text{C}$  and released under either constant white (**a,b**), red (**c,d**) or  
1028 blue light (**e,f**) at the indicated intensities ( $100 \mu\text{mol m}^{-2} \text{s}^{-1}$ , magenta;  $40 \mu\text{mol m}^{-2} \text{s}^{-1}$ , blue;  $10$   
1029  $\mu\text{mol m}^{-2} \text{s}^{-1}$ , black). Right panels represent the average of detrended bioluminescence traces  $\pm$   
1030 SEM (*N. salina* n=4-18 cultures, two independent lines; *N. oceanica* n=6-20, three independent  
1031 lines). Only rhythmic traces are shown, with the exception of conditions that resulted in no  
1032 rhythmic traces, for which the average trace is shown as a dotted line. Percent values indicate  
1033 percent rhythmic traces. Traces are nudged to aid visualization. Left panels represent the period  
1034 length estimate by FFT-NLLS on Biodare 2 using data from the respective right panel, only  
1035 period lengths of traces considered rhythmic are shown, line indicates average.

1036

1037 **Figure 5.** Rhythms of *N. salina CS::FLUC* expression under different temperatures. Cultures  
1038 were entrained under cycles of 12 h light/12 h dark ( $200 \mu\text{mol m}^{-2} \text{s}^{-1}$ ) and  $22^\circ\text{C}$ . (**a**) *In vivo*  
1039 bioluminescence under constant white light conditions ( $10 \mu\text{mol m}^{-2} \text{s}^{-1}$ ). Cultures were switched  
1040 to  $17^\circ\text{C}$  or  $19^\circ\text{C}$  at time 12 h, and to  $25^\circ\text{C}$  or  $28^\circ\text{C}$  at time 24 h. The average detrended  
1041 bioluminescence of rhythmic cultures  $\pm$  SEM is shown (*N. salina* n=2-15, two independent lines;  
1042 *N. oceanica* n=6-18, three independent transgenic lines). Traces are nudged to aid visualization.  
1043 (**b**) Period lengths estimated by FFT-NLLS on Biodare 2 using data from *N. salina* shown in (**a**).  
1044 Only period lengths of traces considered rhythmic are shown. (**c**) *In vivo* bioluminescence of  
1045 *CS::FLUC* in *N. salina* under T6 cycles. Cultures were transferred to cycles of 3 h white light  
1046 ( $100 \mu\text{mol m}^{-2} \text{s}^{-1}$ ) and 3 h of dark at time 24 h. Grey shadings indicate dark periods. Cultures  
1047 were switched to different temperatures as described for (**a**). The average bioluminescence per  
1048 rhythmic culture  $\pm$  SEM of rhythmic traces is shown (n=2-7). Percent values indicate the percent  
1049 of rhythmic traces. (**d**) Period length of traces shown in **c** estimated by FFT-NLLS on Biodare 2.  
1050  $Q_{10}$ , factor by which the rate of a reaction varies in response to a  $10^\circ\text{C}$  change in temperature  
1051 calculated using the slopes from (**b**) and (**d**) respectively.

1052

1053 **Figure 6.** Light entrainment in *Nannochloropsis* species using *CS::FLUC* expressing lines. **(a)**  
1054 Experimental jet-lag recovery in *N. salina*. Left panel, *in vivo* bioluminescence, traces from one  
1055 representative experiment with cultures from two independent transgenic lines are shown. Grey  
1056 shading indicates dark period. Cells were entrained under cycles of 12 h light/12 h dark and 22°C  
1057 before the start of the experiment. At time 72 h (arrow) the night was extended by 6 h. Right  
1058 panel, time of maximum luminescence with respect to last dawn (ZT in h) before (day 1 and 2)  
1059 and after (days 3-4) the experimental jet-lag (average  $\pm$  SEM; n= 19). **(b-d)** Phase response curve  
1060 of *CS::FLUC* rhythms in *N. salina*. After entrainment under cycles of 12 h light/12 h dark and  
1061 22°C for 7 days, cultures were exposed to one dark period of variable length before being  
1062 transferred to constant light (10  $\mu\text{mol m}^{-2} \text{s}^{-1}$ ). Representative experiment using white light and  
1063 extended nights **(b)** or short nights **(c)** (average  $\pm$  SEM, n = 4, one transgenic line). For **(b)** the  
1064 length of the dark periods were 12 h (black), 15 h (magenta), 18 h (blue), 21 h (yellow) or 24 h  
1065 (green); and for **(c)**, 0 h (black), 3 h (magenta), 6 h (blue), 9 h (yellow) or 12 h (green). **(d)** Phase  
1066 of peak luminescence (x-axis) versus the duration of the dark period (y-axis) after transfer to  
1067 either white, blue or red light (average  $\pm$  range of two independent transgenic lines). **(e-f)** *In vivo*  
1068 luminescence under different T-cycles, with 30  $\mu\text{mol m}^{-2} \text{s}^{-1}$  white light (average  $\pm$  SEM, n = 16,  
1069 two transgenic lines). **(g-h)** Phase angle of bioluminescence oscillations shown in (e) and (f),  
1070 using traces from the second day in the respective T-cycle (average  $\pm$  SEM, n = 16). Significant  
1071 difference to T24 (\*) p<0.05, (\*\*) p<0.001(unpaired *t*-test).

1072

1073 **Figure 7.** Temperature entrainment in *Nannochloropsis* species. **(a)** *In vivo* bioluminescence  
1074 rhythms of *CS::FLUC* in *N. oceanica* (black) and *N. salina* (blue). Cultures were entrained under  
1075 cycles of 12 h 17°C /12 h 27°C and 200  $\mu\text{mol m}^{-2} \text{s}^{-1}$  white light. Bioluminescence was recorded  
1076 for one warm/cool cycle (40  $\mu\text{mol m}^{-2} \text{s}^{-1}$ ) and at time 24 h cells were transferred to constant  
1077 temperature (22°C) and constant light (40  $\mu\text{mol m}^{-2} \text{s}^{-1}$ ). The detrended bioluminescence  $\pm$  SEM  
1078 of cycling lines (*N. salina* n=6, two independent lines; *N. oceanica* n=3, three independent lines);  
1079 purple shading indicates cool period, dotted lines indicate subjective cool to warm transition.  
1080 Amplitude and baseline detrending was implemented on Biodare 2. **(b)** Period length of cycling  
1081 cultures estimated using FFT-NLLS on Biodare 2. Percent cycling cultures are indicated.

1082

1083 **Figure 8.** Modulation of *CS::FLUC* rhythms in *N. salina* by a CK1 $\epsilon/\delta$  inhibitor. **(a)** *In vivo*  
1084 bioluminescence rhythms of *N. salina* *CS::FLUC* expressing lines. The average  $\pm$  SEM from  
1085 rhythmic traces is shown (n =3-8, two independent lines). Cultures were entrained under cycles  
1086 of 12 h light/12 h dark (200  $\mu\text{mol m}^{-2} \text{s}^{-1}$ ) and released to constant light (10  $\mu\text{mol m}^{-2} \text{s}^{-1}$ ) at time  
1087 24 h. Cells were treated with PF-670462 at the indicated concentrations at time 12 h. Traces from  
1088 one representative experiment are shown. Dark grey shading indicates dark period, light grey  
1089 shading indicates subjective dark. **b** Time of first peak of *CS::FLUC* luminescence (n=8-16)  
1090 from two independent experiments. \* Indicate a significant difference with the vehicle control  
1091 (one-way ANOVA with Dunnett's post hoc test,  $\alpha=0.05$ ).  
1092

## Figures

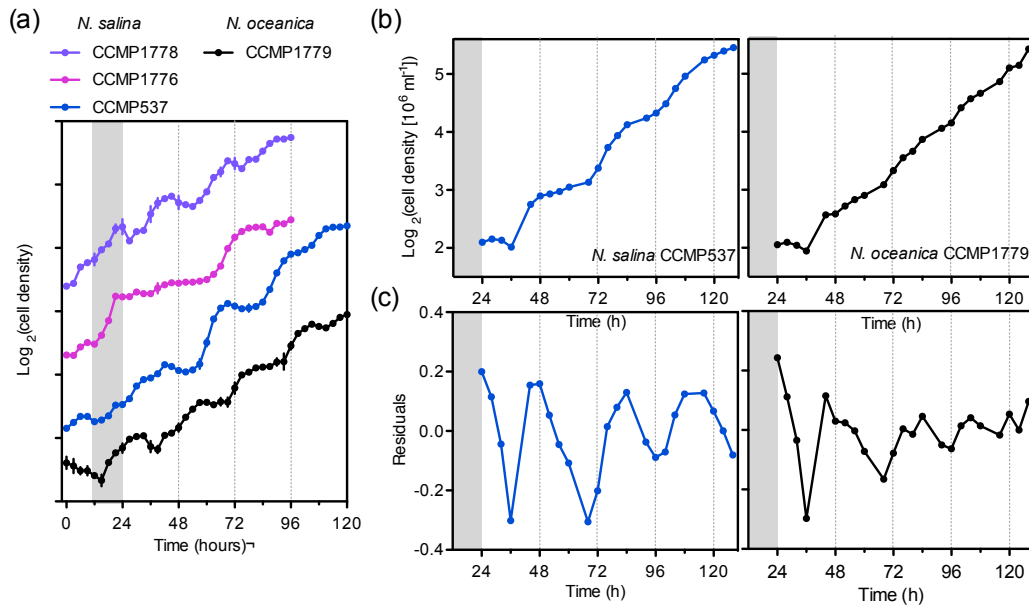

**Figure 1.** Cell division oscillations in *Nannochloropsis* species under light/dark and constant light conditions. **(a)** Cultures entrained under diel conditions (12 h light/12 h dark,  $100 \mu\text{mol m}^{-2} \text{s}^{-1}$ ) and then moved to constant light ( $40 \mu\text{mol m}^{-2} \text{s}^{-1}$ ). Values are the average  $\pm$  SEM ( $n=3$  cultures) and traces are nudged to aid visualization. **(b)** Cultures grown under diel conditions (12 h light/12 h dark,  $40 \mu\text{mol m}^{-2} \text{s}^{-1}$ ) for 10 days and then released to constant light ( $40 \mu\text{mol m}^{-2} \text{s}^{-1}$ ). Values are the average  $\pm$  SEM ( $n=3$ , *N. salina*;  $n=2$  *N. oceanica*). Grey shading indicates dark period. **(c)** Residuals after determining a linear regression of the plots shown in (b) to extract the oscillatory component.

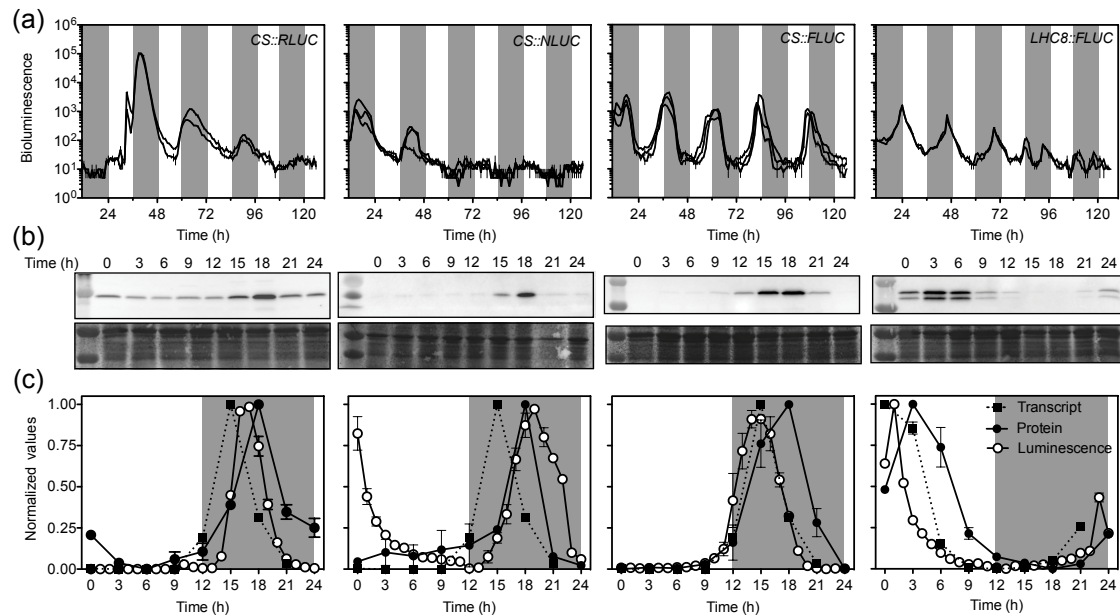

**Figure 2.** The development of bioluminescence reporters in *N. oceanica* CCMP1779. **(a)** *In vivo* luminescence oscillations of cells expressing *CS::RLUC*, *CS::NLUC*, *CS::FLUC* or *LHC8::FLUC* bioluminescence reporters under light/dark cycles. Dark grey shading indicates dark period. Luminescence was recorded every hour and the average bioluminescence per independent transgenic line  $\pm$  SEM is shown ( $n=2$  cultures). *CS*, cellulose synthase promoter; *LHC8*, light harvesting complex 8 promoter; *RLUC*, renilla luciferase; *NLUC*, nanoluciferase; *FLUC*, firefly luciferase. **(b)** Representative western blots of the luciferase proteins from the transgenic reporter lines shown in **(a)** (top panel) and the blot stained with DB71 as loading control (bottom panel) over the course of one light/dark cycle. Light and dark periods are as indicated with grey shading in **c**. *NLUC* and *FLUC* contain a HA tag and were detected using an  $\alpha$ -HA antibody. Renilla luciferase was detected using a specific antibody. **(c)** Quantitation of luciferase protein, and *in vivo* luminescence of one of the lines shown in **(a)**, and the transcript abundance of the respective endogenous gene. Expression was normalized between 0 and 1 and the average  $\pm$  SEM ( $n=2$  cultures) is shown. Transcript abundance data is from RNA-seq (Poliner *et al.*, 2015).

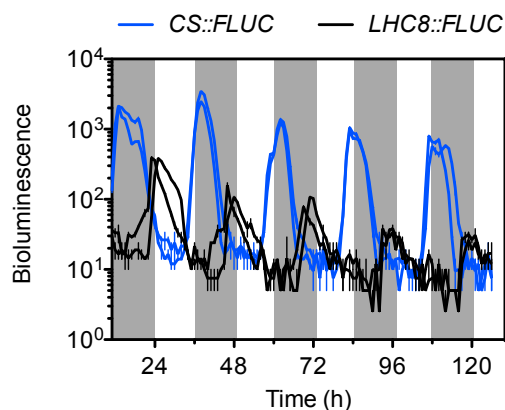

**Figure 3.** Bioluminescence oscillations of *N. salina* expressing *CS::FLUC* or *LHC8::FLUC* under light/dark cycles. Grey shading indicates dark period. Luminescence was recorded every hour and the average bioluminescence per independent transgenic line  $\pm$  SEM is shown (n=2). *CS*, cellulose synthase promoter; *LHC8*, light harvesting complex 8 promoter; *FLUC*, firefly luciferase.

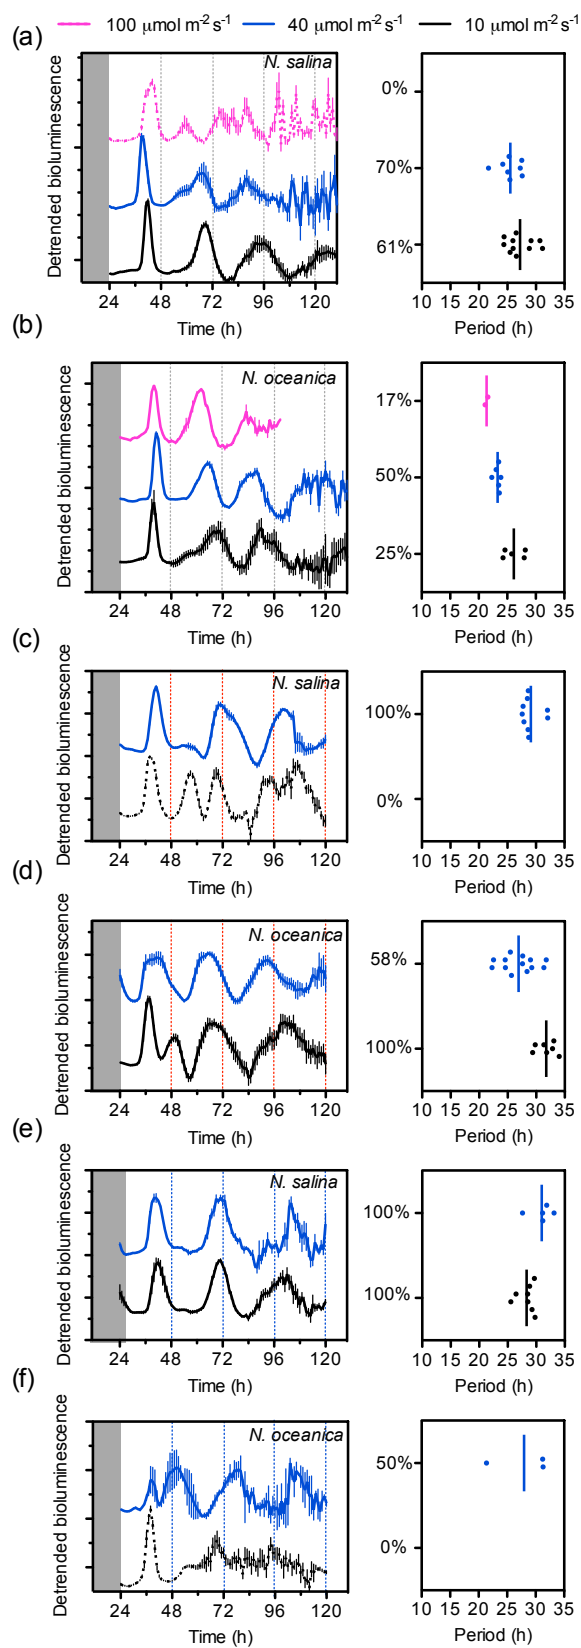



**Figure 4.** *In vivo* bioluminescence oscillations of *CS::FLUC* expressing lines from two *Nannochloropsis* species in constant light. Cultures were entrained under cycles of 12 h light/12 h dark ( $200 \mu\text{mol m}^{-2} \text{s}^{-1}$ ) and  $22^\circ\text{C}$  and released under either constant white (**a,b**), red (**c,d**) or blue light (**e,f**) at the indicated intensities ( $100 \mu\text{mol m}^{-2} \text{s}^{-1}$ , magenta;  $40 \mu\text{mol m}^{-2} \text{s}^{-1}$ , blue;  $10 \mu\text{mol m}^{-2} \text{s}^{-1}$ , black). Right panels represent the average of detrended bioluminescence traces  $\pm$  SEM (*N. salina* n=4-18 cultures, two independent lines; *N. oceanica* n=6-20, three independent lines). Only rhythmic traces are shown, with the exception of conditions that resulted in no rhythmic traces, for which the average trace is shown as a dotted line. Percent values indicate percent rhythmic traces. Traces are nudged to aid visualization. Left panels represent the period length estimate by FFT-NLLS on Biodare 2 using data from the respective right panel, only period lengths of traces considered rhythmic are shown, line indicates average.

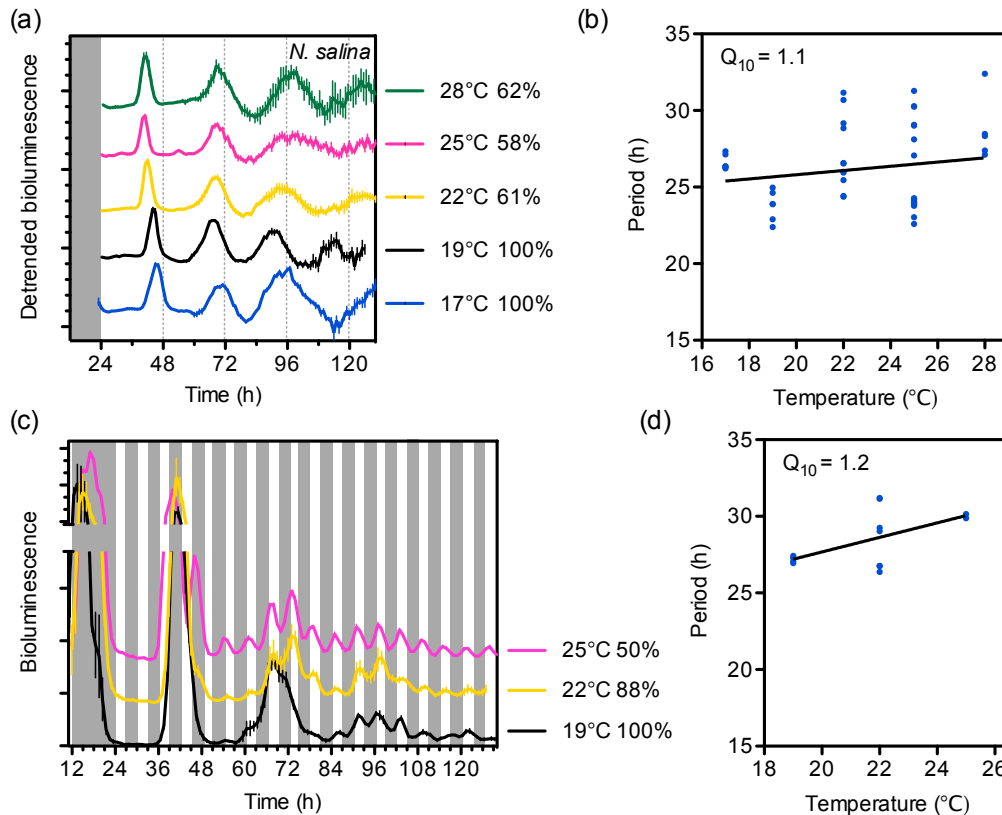

**Figure 5.** Rhythms of *N. salina* *CS::FLUC* expression under different temperatures. Cultures were entrained under cycles of 12 h light/12 h dark ( $200 \mu\text{mol m}^{-2} \text{s}^{-1}$ ) and  $22^\circ\text{C}$ . **(a)** *In vivo* bioluminescence under constant white light conditions ( $10 \mu\text{mol m}^{-2} \text{s}^{-1}$ ). Cultures were switched to  $17^\circ\text{C}$  or  $19^\circ\text{C}$  at time 12 h, and to  $25^\circ\text{C}$  or  $28^\circ\text{C}$  at time 24 h. The average detrended bioluminescence of rhythmic cultures  $\pm$  SEM is shown (*N. salina*  $n=2-15$ , two independent lines; *N. oceanica*  $n=6-18$ , three independent transgenic lines). Traces are nudged to aid visualization. **(b)** Period lengths estimated by FFT-NLLS on Biodare 2 using data from *N. salina* shown in (a). Only period lengths of traces considered rhythmic are shown. **(c)** *In vivo* bioluminescence of *CS::FLUC* in *N. salina* under T6 cycles. Cultures were transferred to cycles of 3 h white light ( $100 \mu\text{mol m}^{-2} \text{s}^{-1}$ ) and 3 h of dark at time 24 h. Grey shadings indicate dark periods. Cultures were switched to different temperatures as described for (a). The average bioluminescence per rhythmic culture  $\pm$  SEM of rhythmic traces is shown ( $n=2-7$ ). Percent values indicate the percent of rhythmic traces. **(d)** Period length of traces shown in c estimated by FFT-NLLS on Biodare 2.

$Q_{10}$ , factor by which the rate of a reaction varies in response to a  $10^{\circ}\text{C}$  change in temperature calculated using the slopes from **(b)** and **(d)** respectively.

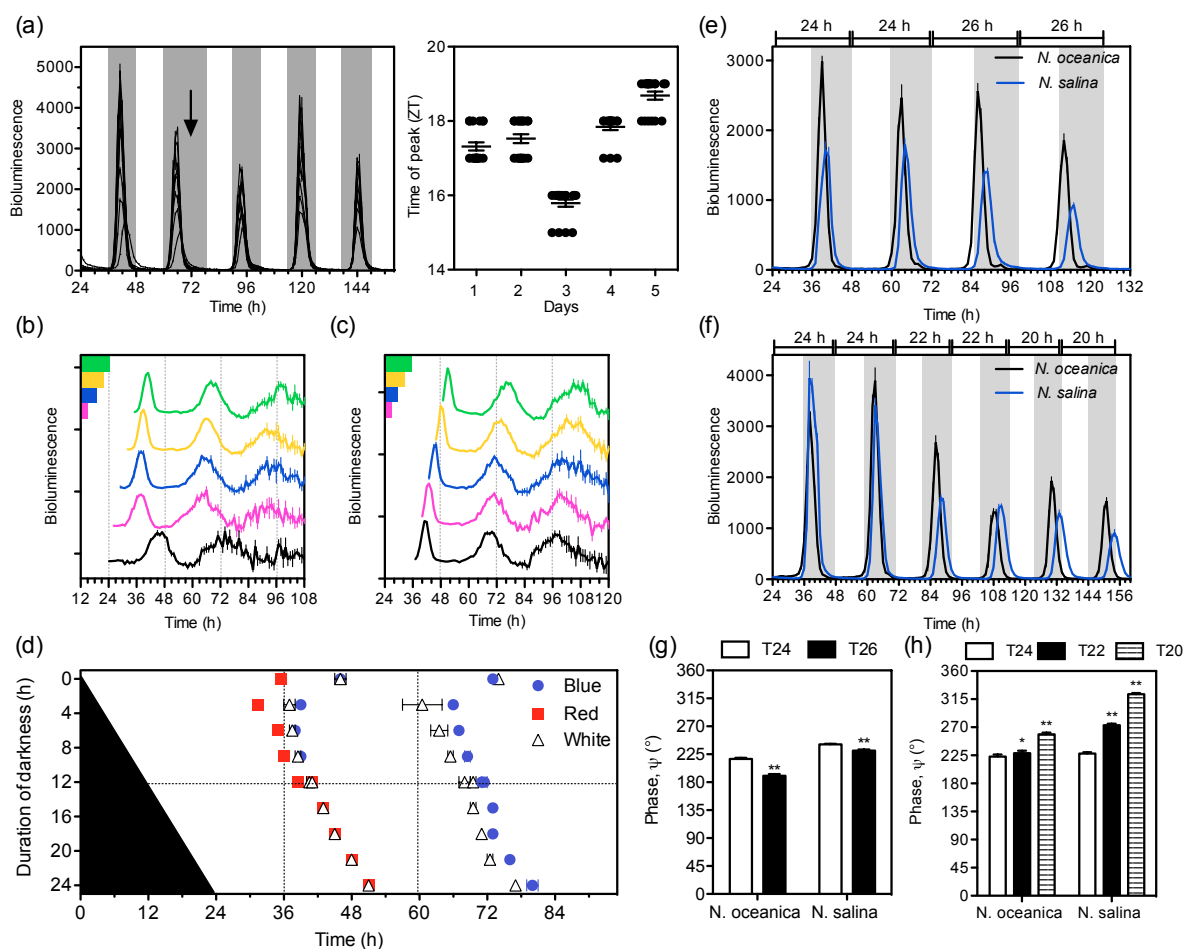

**Figure 6.** Light entrainment in *Nannochloropsis* species using *CS::FLUC* expressing lines. **(a)** Experimental jet-lag recovery in *N. salina*. Left panel, *in vivo* bioluminescence, traces from one representative experiment with cultures from two independent transgenic lines are shown. Grey shading indicates dark period. Cells were entrained under cycles of 12 h light/12 h dark and 22°C before the start of the experiment. At time 72 h (arrow) the night was extended by 6 h. Right panel, time of maximum luminescence with respect to last dawn (ZT in h) before (day 1 and 2) and after (days 3-4) the experimental jet-lag (average  $\pm$  SEM; n= 19). **(b-d)** Phase response curve of *CS::FLUC* rhythms *in N. salina*. After entrainment under cycles of 12 h light/12 h dark and 22°C for 7 days, cultures were exposed to one dark period of variable length before being transferred to constant light ( $10 \mu\text{mol m}^{-2} \text{s}^{-1}$ ). Representative experiment using white light and extended nights **(b)** or short nights **(c)** (average  $\pm$  SEM, n = 4, one transgenic line). For **(b)** the length of the dark periods were 12 h (black), 15 h (magenta), 18 h (blue), 21 h (yellow) or 24 h (green); and for **(c)**, 0 h (black), 3 h (magenta), 6 h (blue), 9 h (yellow) or 12 h (green). **(d)** Phase

of peak luminescence (x-axis) versus the duration of the dark period (y-axis) after transfer to either white, blue or red light (average  $\pm$  range of two independent transgenic lines). **(e-f)** *In vivo* luminescence under different T-cycles, with  $30 \mu\text{mol m}^{-2} \text{s}^{-1}$  white light (average  $\pm$  SEM, n = 16, two transgenic lines). **(g-h)** Phase angle of bioluminescence oscillations shown in (e) and (f), using traces from the second day in the respective T-cycle (average  $\pm$  SEM, n = 16). Significant difference to T24 (\*)  $p < 0.05$ , (\*\*)  $p < 0.001$  (unpaired *t*-test).

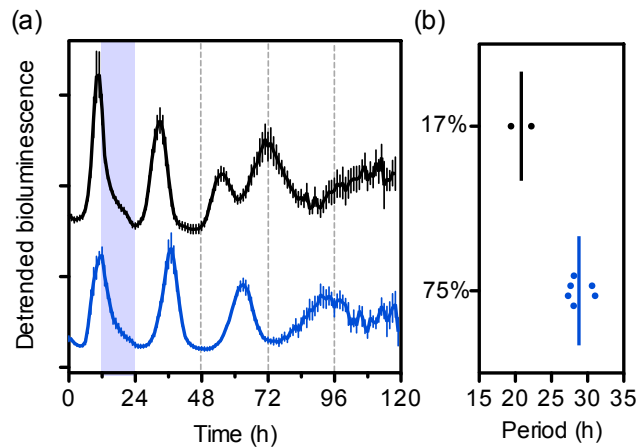

**Figure 7.** Temperature entrainment in *Nannochloropsis* species. **(a)** *In vivo* bioluminescence rhythms of *CS::FLUC* in *N. oceanica* (black) and *N. salina* (blue). Cultures were entrained under cycles of 12 h 17°C /12 h 27°C and 200  $\mu\text{mol m}^{-2} \text{s}^{-1}$  white light. Bioluminescence was recorded for one warm/cool cycle (40  $\mu\text{mol m}^{-2} \text{s}^{-1}$ ) and at time 24 h cells were transferred to constant temperature (22°C) and constant light (40  $\mu\text{mol m}^{-2} \text{s}^{-1}$ ). The detrended bioluminescence  $\pm$  SEM of cycling lines (*N. salina* n=6, two independent lines; *N. oceanica* n=3, three independent lines); purple shading indicates cool period, dotted lines indicate subjective cool to warm transition. Amplitude and baseline detrending was implemented on Biodare 2. **(b)** Period length of cycling cultures estimated using FFT-NLLS on Biodare 2. Percent cycling cultures are indicated.

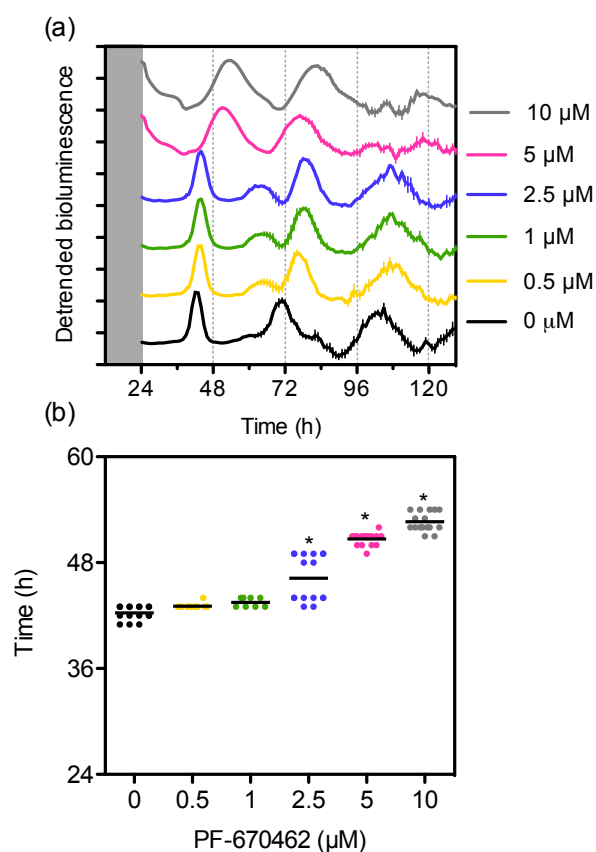

**Figure 8.** Modulation of *CS::FLUC* rhythms in *N. salina* by a CK1 $\epsilon/\delta$  inhibitor. **(a)** *In vivo* bioluminescence rhythms of *N. salina* *CS::FLUC* expressing lines. The average  $\pm$  SEM from rhythmic traces is shown ( $n=3-8$ , two independent lines). Cultures were entrained under cycles of 12 h light/12 h dark ( $200 \mu\text{mol m}^{-2} \text{s}^{-1}$ ) and released to constant light ( $10 \mu\text{mol m}^{-2} \text{s}^{-1}$ ) at time 24 h. Cells were treated with PF-670462 at the indicated concentrations at time 12 h. Traces from one representative experiment are shown. Dark grey shading indicates dark period, light grey shading indicates subjective dark. **(b)** Time of first peak of *CS::FLUC* luminescence ( $n=8-16$ ) from two independent experiments. \* Indicate a significant difference with the vehicle control (one-way ANOVA with Dunnett's post hoc test,  $\alpha=0.05$ ).
